# Supplementary material for: DNA crossover flexibilities upon discrete spacers revealed by single-molecule FRET
Source: Royal Society of Chemistry journal article supplement (doi:10.1039/d4sm01028k), 2024-11-25
Supplement: d4sm01028k2.pdf [file d4sm01028k2.pdf]

## DNA crossover flexibilities upon discrete spacers revealed by single-molecule FRET

Xueqiao Li<sup>†1</sup>, Libang Wang<sup>†2</sup>, Wenna Wu<sup>1</sup>, Huajie Liu<sup>3</sup>, Chunhua Xu<sup>2\*</sup>, Tao Zhang<sup>1\*</sup>

<sup>1</sup>Department of Applied Chemistry, School of Chemistry and Chemical Engineering, Yantai University, Yantai 264006, China

<sup>2</sup>Beijing National Laboratory for Condensed Matter Physics and Laboratory of Soft Matter and Biological Physics, Institute of Physics, Chinese Academy of Sciences, Beijing 100190, China

<sup>3</sup>School of Chemical Science and Engineering, Shanghai Research Institute for Intelligent Autonomous Systems, Key Laboratory of Advanced Civil Engineering Materials of Ministry of Education, Tongji University, Shanghai, 200092, China

<sup>†</sup>These authors contribute equally.

E-mail: xch@iphy.ac.cn, tao.zhang@ytu.edu.cn

**Supplementary Information Note S1: Structure design.** The origami was designed using caDNAno. The structure consists of the 14 HB pillar with pedestal 3x 14HBs at the bottom and a minor 6HB structure with all helix packed in honeycomb lattice. The pedestal part is about 30.6 nm high, the upper 14HB is about 66.7 nm (97.3-30.6 nm), and the 6HB is about 49.9 nm. The 6HB is connected with major pillar through DNA scaffold. Two scaffold loops are stored at two ends of 6HB and other two loops are stored at the 14 HB pillar. By shifting scaffold in loop region to the spacer region, it leads to different kinds of spacer type of various length, namely complementary spacer, non-complementary spacer, and the Holliday junction without any bases inserted. This simplified the design procedure, and also minimized the cost for ordering oligonucleotides. The scaffold routing is same for all designs but the starting base is different for complementary or non-complementary spacer. The scaffold intramolecular self-hybridization 11 basepair is addressed with the help of Mfold online server. In order to place the complementary/non-complementary sequences in the spacer region, the overall scaffold sequences are shifted to different starting bases. To anchor DNA structure on glass slide, 19x docking strands are added at the bottom for hybridizing biotin oligonucleotides.

**Supplementary Information Note S2: Folding, purification and TEM imaging.** DNA origami structures were prepared by mixing core staples and the spacer staples for different kinds (100 nM each), biotin modified oligos (200 nM each), Cy3 and Cy5 modified oligonucleotides (500 nM each), and the circular DNA scaffold strand p8634 (12.5 nM) in 1x TE-Mg<sup>2+</sup> buffer (10 mM Tris, 1 mM EDTA, 16 mM MgCl<sub>2</sub>). The mixture was thermally annealed from 65 °C to 4 °C over 35 h (15 min at 65 °C, cooling to 58 °C with a cooling rate of -1 °C per 5 min, 58 °C to 35 °C with rate of -1 °C per 1 h, and from 35 °C to 4 °C with rate of -1 °C per 5 min). Subsequently the folded DNA nanostructures were purified from excess DNA staples by agarose gel electrophoresis without staining, 1 % agarose gels containing 1x Tris-acetate buffer (10 mM Tris, 10 mM acetic acid), 11 mM MgCl<sub>2</sub>, 65V. All gels were cooled in ice water baths. To avoid contamination during staining, extra samples loaded in the nearby gel pocket were used as control which were excised and stained separately with ethidium bromide. The stained gel pieces were then used as control under gel imager for a blind excision of the desired gel band that were not stained. Structure recovery is accomplished by squeezing the gel between two parafilm-covered glass slides and collecting the resulting liquid droplet with a pipet.

TEM imaging of DNA origami lattices was carried out using a JEM-1400plus transmission electron microscope (JEOL) operating at 100 kV. For sample preparation 10 µL of polymerized DNA origami structures were deposited on plasma cleaned TEM grids for 15 mins and were furthermore quickly washed once with 0.1 % uranyl acetate solution (5 µL) and immediately afterwards stained with 0.1 % uranyl acetate solution (5 µL) for 10 s.

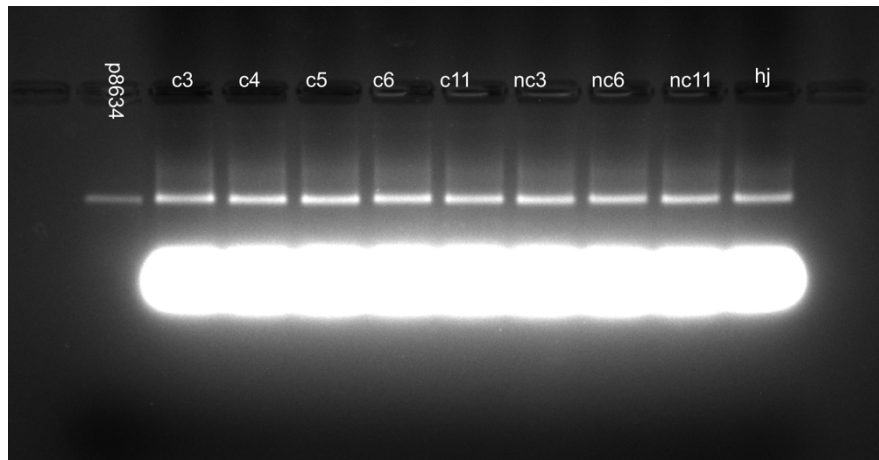

**Supplementary Information Figure S1.** Agarose gel electrophoresis for designs with different kinds of spacers. 1 % agarose gels containing 1x Tris-acetate buffer (10 mM Tris, 10 mM acetic acid), 11 mM MgCl<sub>2</sub>, 65V. Full gel stained with ethidium bromide

### Supplementary Information Note S3: Fluorescence measurement and angle calculations.

Glass slides were cleaned by rinsing with acetone, methanol, a mixture of sulfuric acid and hydrogen peroxide with a volume ratio of 7:3, and then sodium ethoxide. The surface was coated with a mixture of 99% mPEG (m-PEG-5000, Laysan Bio, Inc.) and 1% of biotin-PEG (biotin-PEG-5000, Laysan Bio, Inc.). The imaging buffer was composed of 25 mM Tris-HCl (pH 7.5), 50 mM NaCl, 5 mM MgCl<sub>2</sub>, 2 mM DTT and an oxygen scavenging system (0.8% D-glucose; 1 mg/ml glucose oxidase; 0.4 mg/ml catalase; 1 mM Trolox). The experiments were performed on an objective-based total-internal-reflection fluorescence microscope (IX71, Olympus) at room temperature. Cy3 is excited by a 532-nm Sapphire laser (Coherent Inc., U.S.). An oil-immersion objective (100×, N.A. 1.49) was used to generate an evanescent field of illumination. Fluorescence signals from Cy3 and Cy5 are split by a dichroic mirror, and collected by an electron-multiplying charge-coupled device camera (EMCCD) (iXON, Andor Technology). The exposure time was 50 ms.

For the conversion of FRET efficiency to structure angles, we used the FRET equation  $E = \frac{1}{1 + \left(\frac{r}{r_0}\right)^6}$

( $r_0=5.8$  nm) and the cosine formula  $\alpha = \arccos\left(\frac{m^2+n^2-k^2}{2mn}\right)$ . Typically, longer spacer ( $l$ ) will increase the angle  $\alpha$  as well as FRET distance ( $d$ ). The 6HB and the spacer ( $l$ ) defines a half-plane, and the 14HB and the spacer ( $l$ ) defines another half-plane, but here we assume that dihedral angle ( $\beta$ ) is zero for the sake of simplicity. For a “correct” angle distribution, the spacer length ( $l$ ) maybe the most significant factor. We first used 0.34 nm/base for all kinds of spacers. Due to the entropic elasticity, we think the unit length 0.34 nm/base is not applicable for nc6 and nc11 spacers. Assuming the interstructural angle to be close to 90° can deduce the unit length 0.23nm/base for a 2x ssDNA tether. In addition, if surface diffusion layer merges, the dihedral angle ( $\beta$ ) will be not zero which will complicate the angle calculation.

For calculating the entropic forces, a modified freely-jointed chain (mFJC) model and the force-extension behaviors are adopted from previous researches (references 31-33, specifically *Adv. Mater.*, **2021**, 33, 2101986). When fixing  $d$  to be the length of same bases number in duplex form ( $d = N \times 0.34 \text{ nm/bp}$ ), the entropic force  $F$  is independent of base numbers.

$$d = N \cdot L_B \times \left[ \cos\left(\frac{Fl_k}{k_B T}\right) - \frac{k_B T}{Fl_k} \right] \times \left(1 + \frac{F}{S}\right)$$

| Parameter | Value                                      |
|-----------|--------------------------------------------|
| $L_B$     | 0.63 nm                                    |
| $l_k$     | 1.5 nm                                     |
| $S$       | 800 pN                                     |
| $k_B T$   | 4.114 pNnm                                 |
| $N$       | Base number for non-complementary spacer   |
| $d$       | Length of same bases number in duplex form |

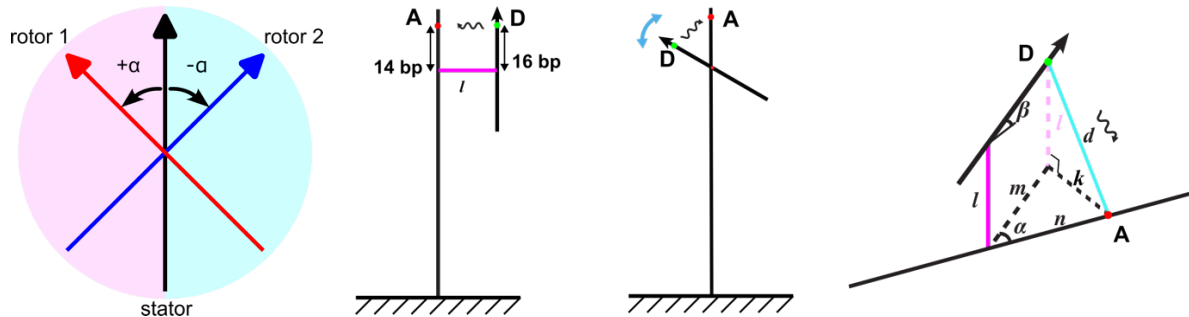

**Supplementary Information Figure S2**, Rotor 1 and rotor 2 attached to stator with different spacer showing different angles and the dihedral illustration for calculation.

**Supplementary Information Table S1**, The expected angles, the measured FRET efficiency and calculated angles for rotor and stator connected with spacers of different length.

| Spacer length (c-type) | Expected angles | FRET efficiency | Calculated angles |
|------------------------|-----------------|-----------------|-------------------|
| 0                      | 58.7°           | 0.70            | 58.7              |
| 3                      | 156.9°          | 0.36            | 76.0              |
| 4                      | 189.6°          | 0.20            | 89.2              |
| 5                      | -137.7°         | 0.20            | 88.1              |
| 6                      | -104.9°         | 0.12            | -99.9             |
| 11                     | 58.7°           | 0.28            | 67.1              |

**Supplementary Information Table S2**: The dihedral angle distributions for all kinds of spacers:

| Spacer  | hj   | c3   | c4   | c5   | c6    | c11  | nc3  | nc6  | nc3&6 | nc11 |
|---------|------|------|------|------|-------|------|------|------|-------|------|
| Angle/° | 58.7 | 76.0 | 89.2 | 88.1 | -99.9 | 67.1 | 75.3 | 82.6 | 81.2  | 89.4 |

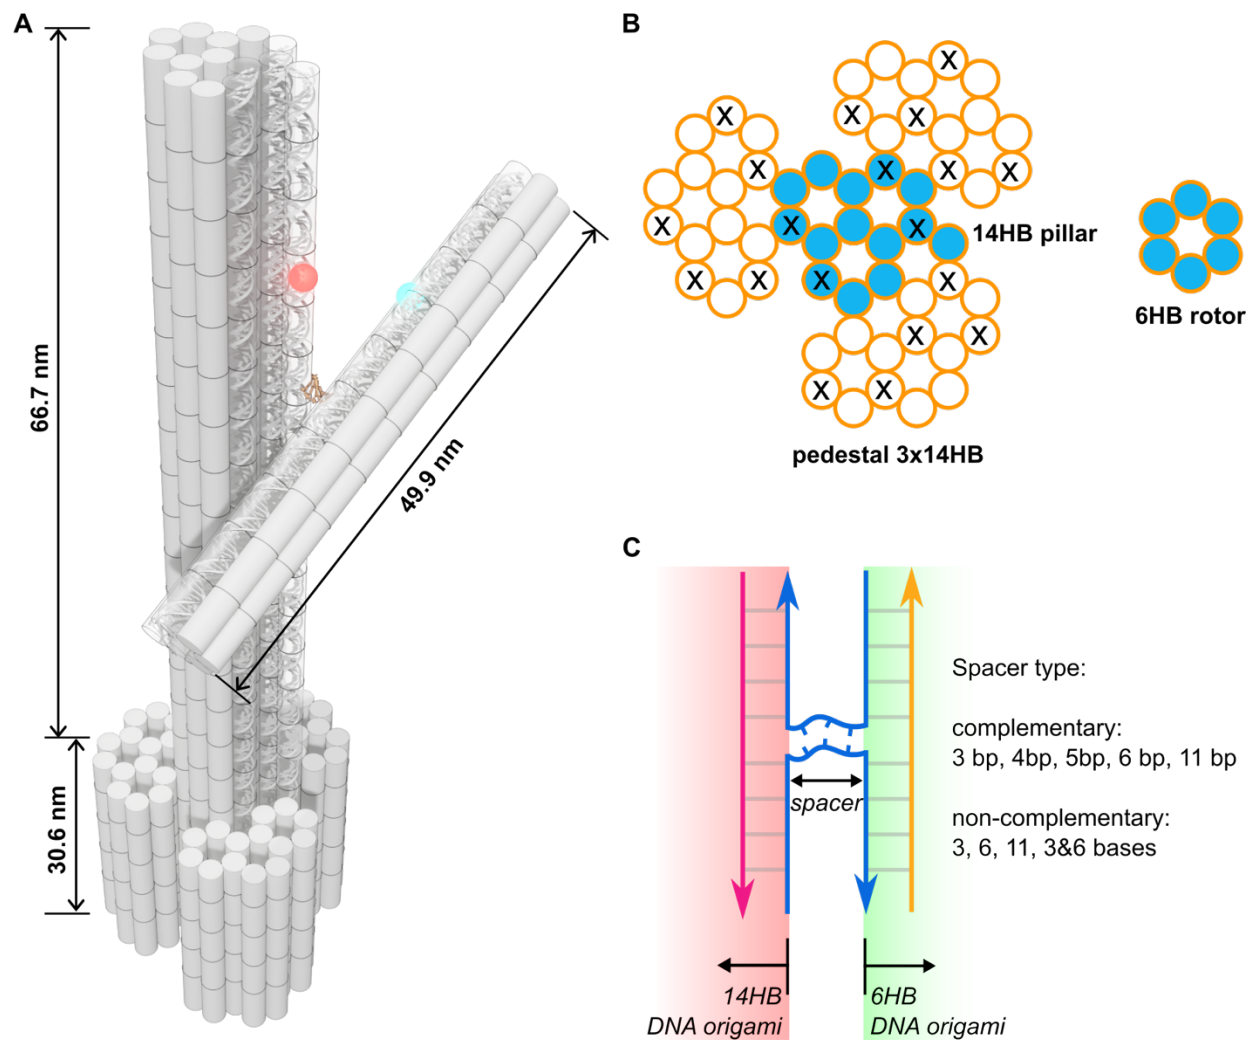

**Supplementary Information Figure S3:** The structural design principles. A, The 3D model showing the stator containing pedestal section and the 14HB pillar, the rotor 6HB. B, The cross-sectional image of the design. The blue circles present 14HB pillar and 6HB rotor respectively. X labels the overhangs for hybridizing biotin-strands. C, The spacer region is via scaffold only.



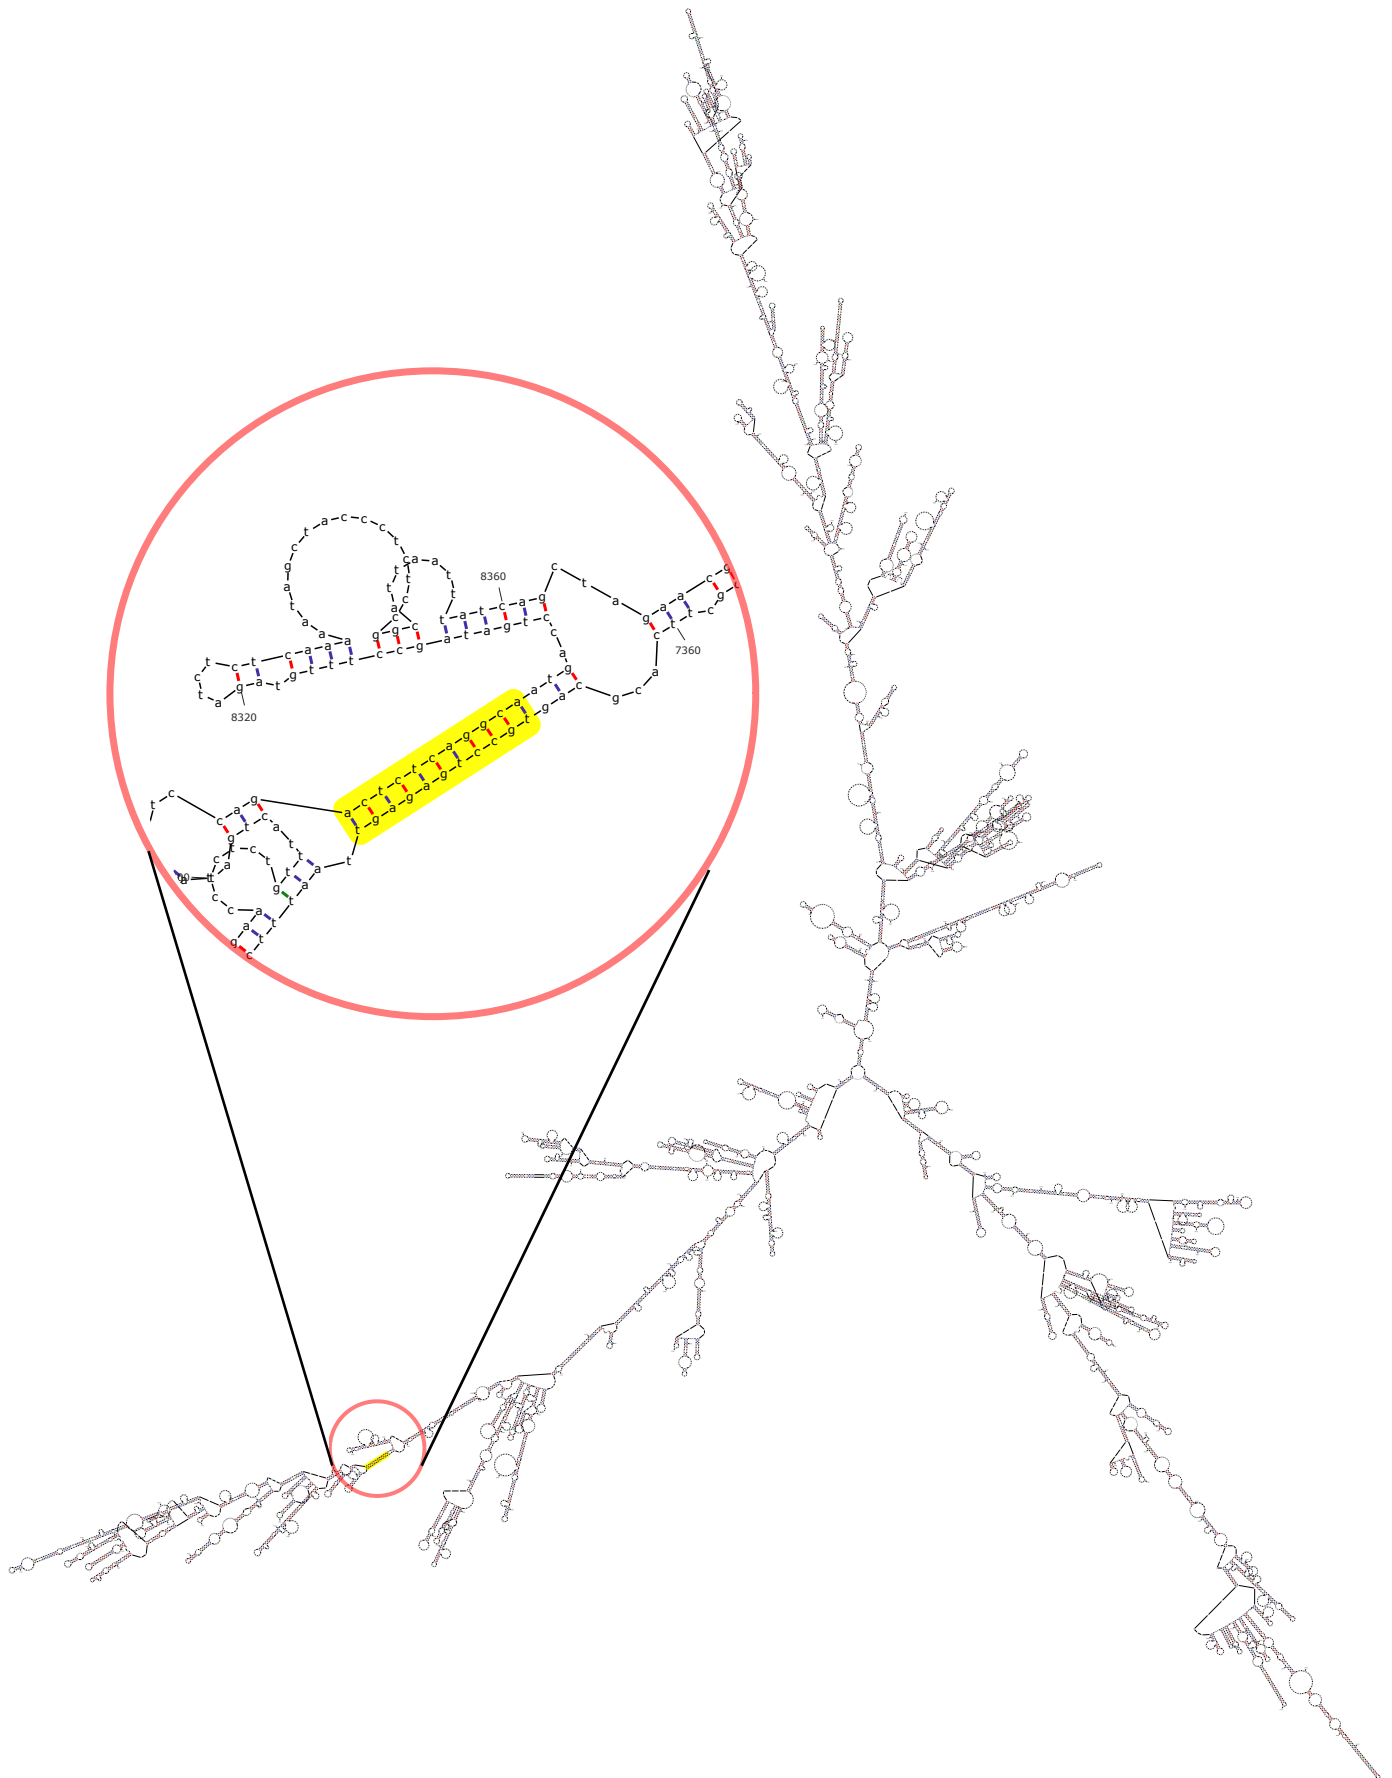

**Supplementary Information Figure S4: The secondary structure of p8634 scaffold calculated by Mfold. The highlighted duplex is for the complementary spacers.**

c3

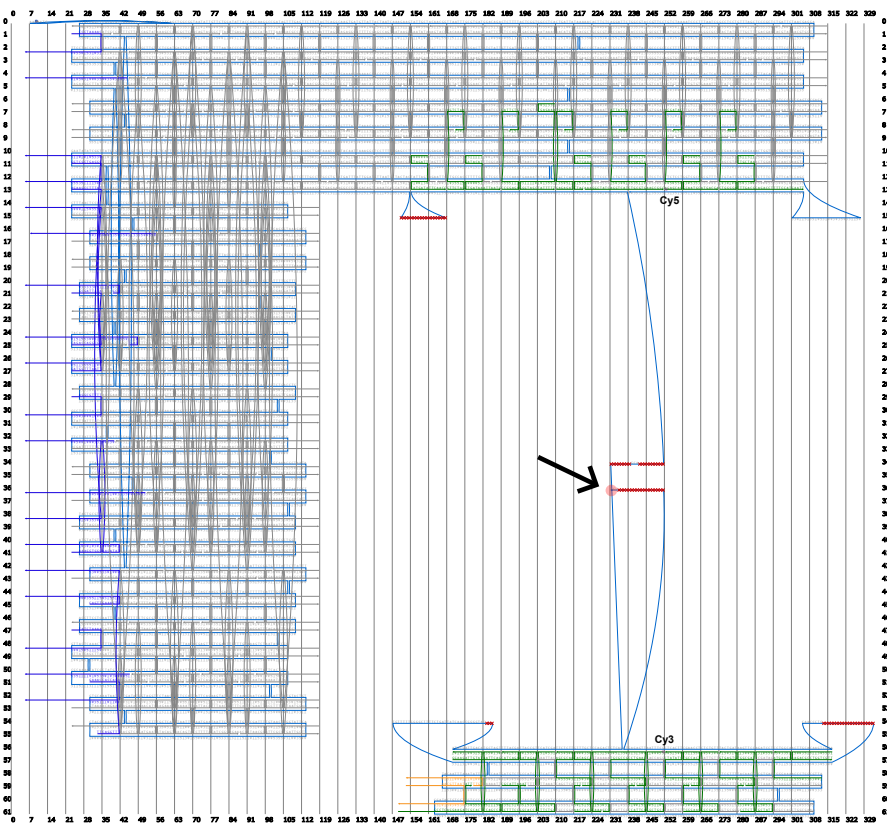

c4

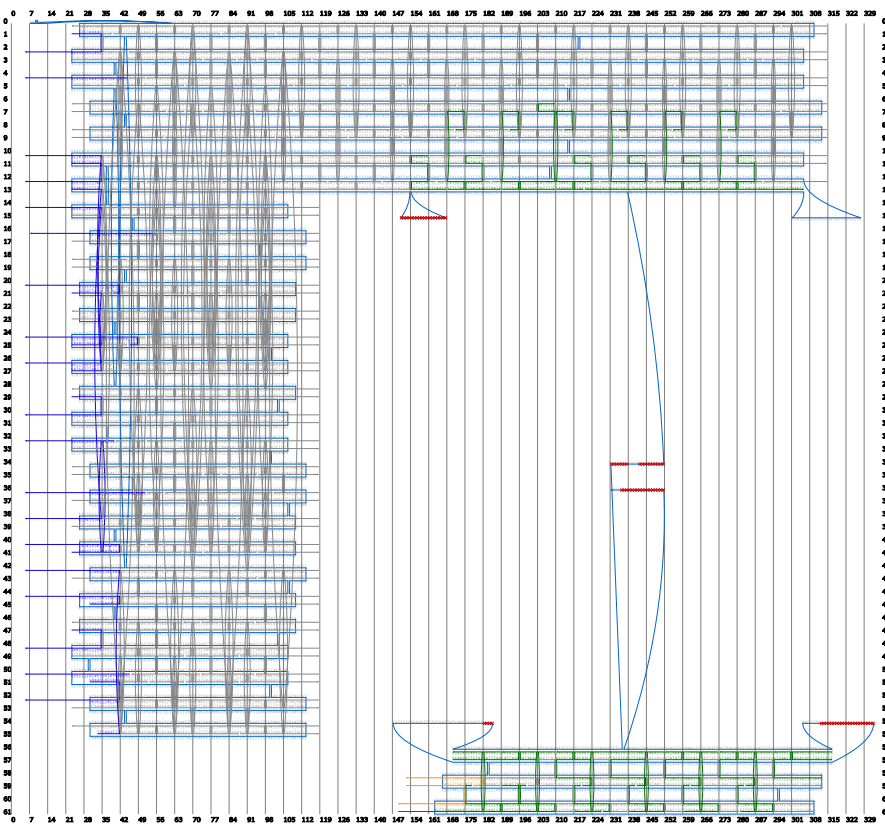

c5

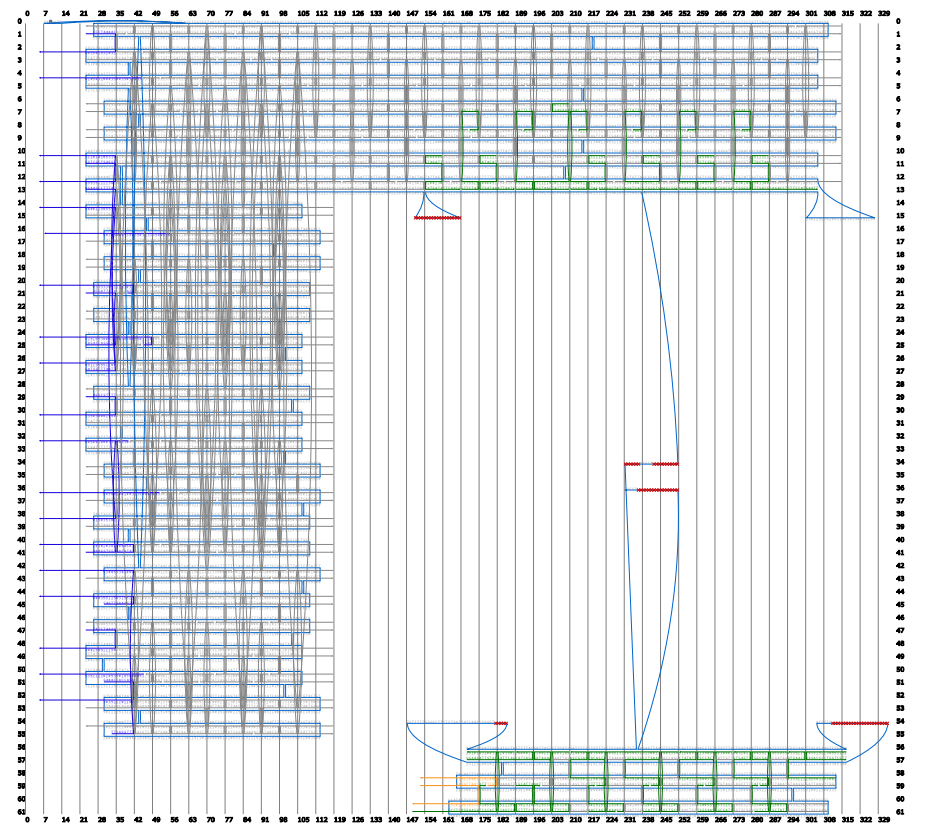

c6

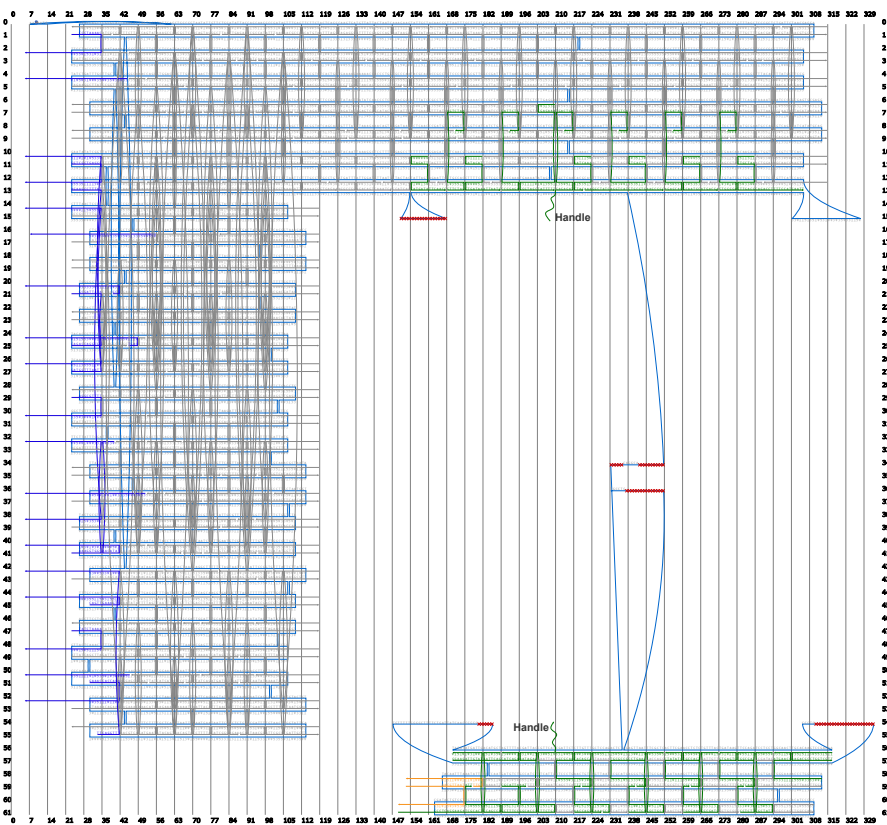

c11

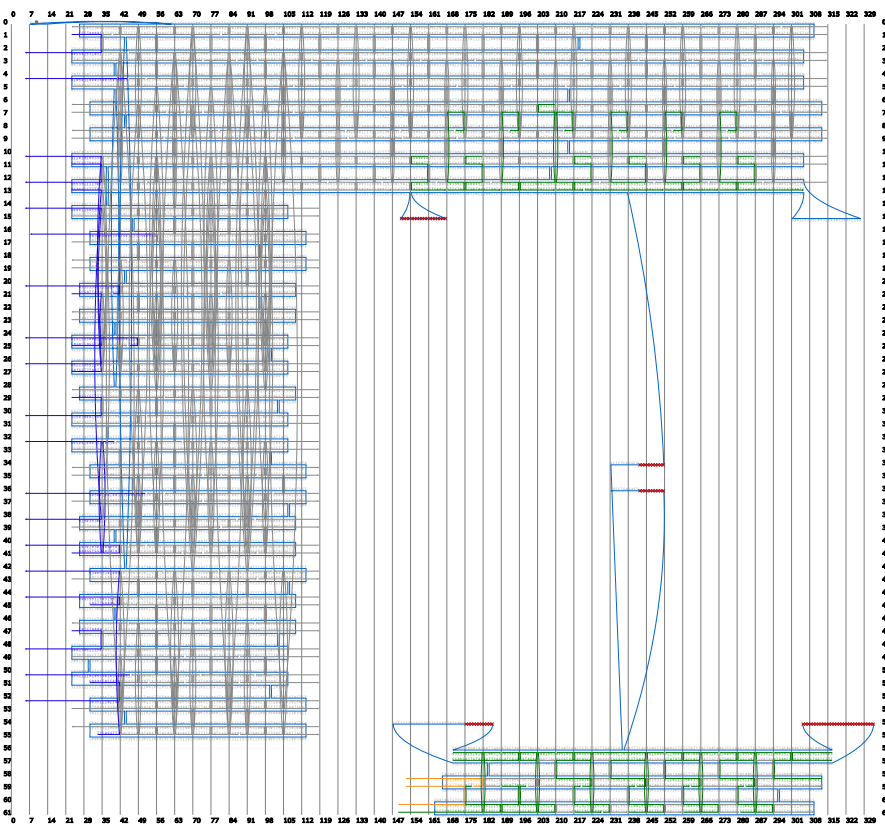

nc3

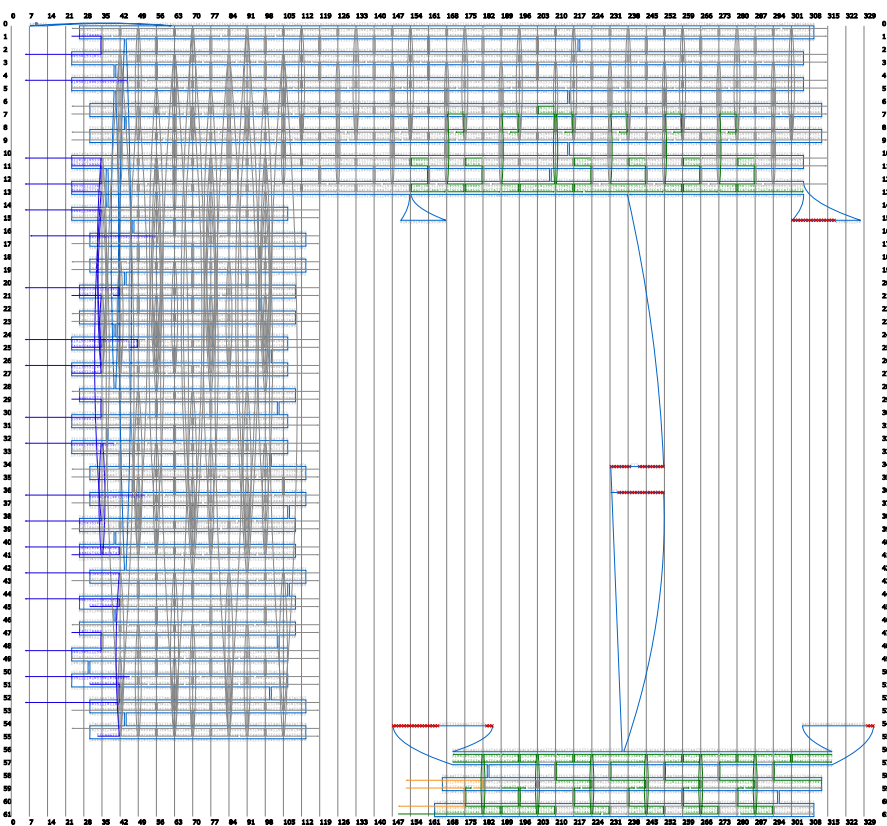

nc6

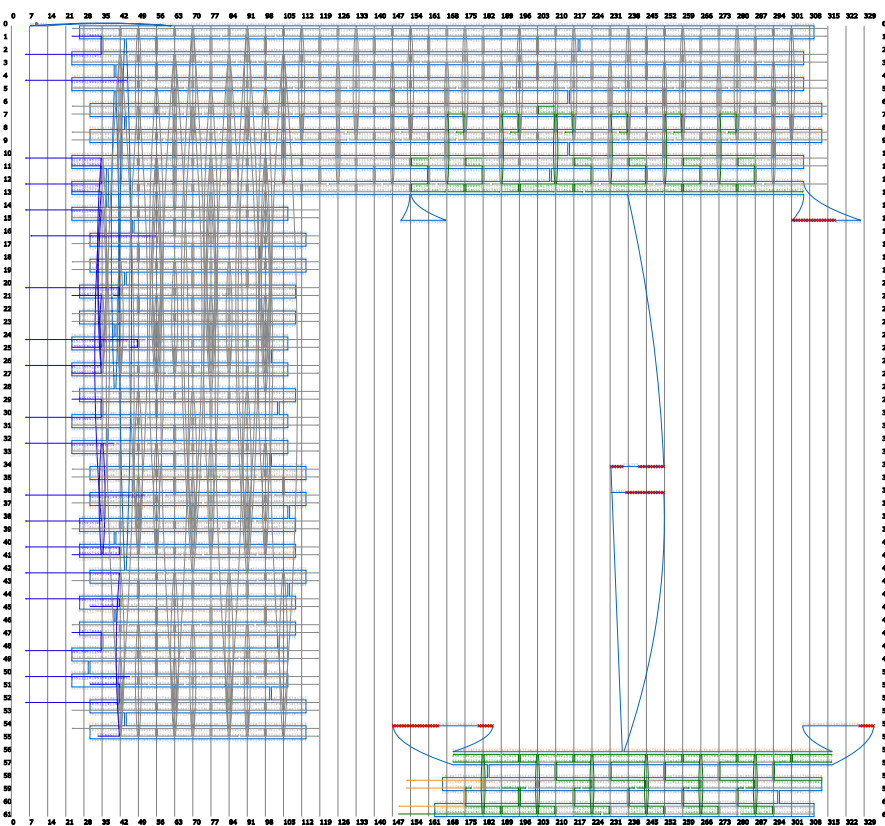

nc11

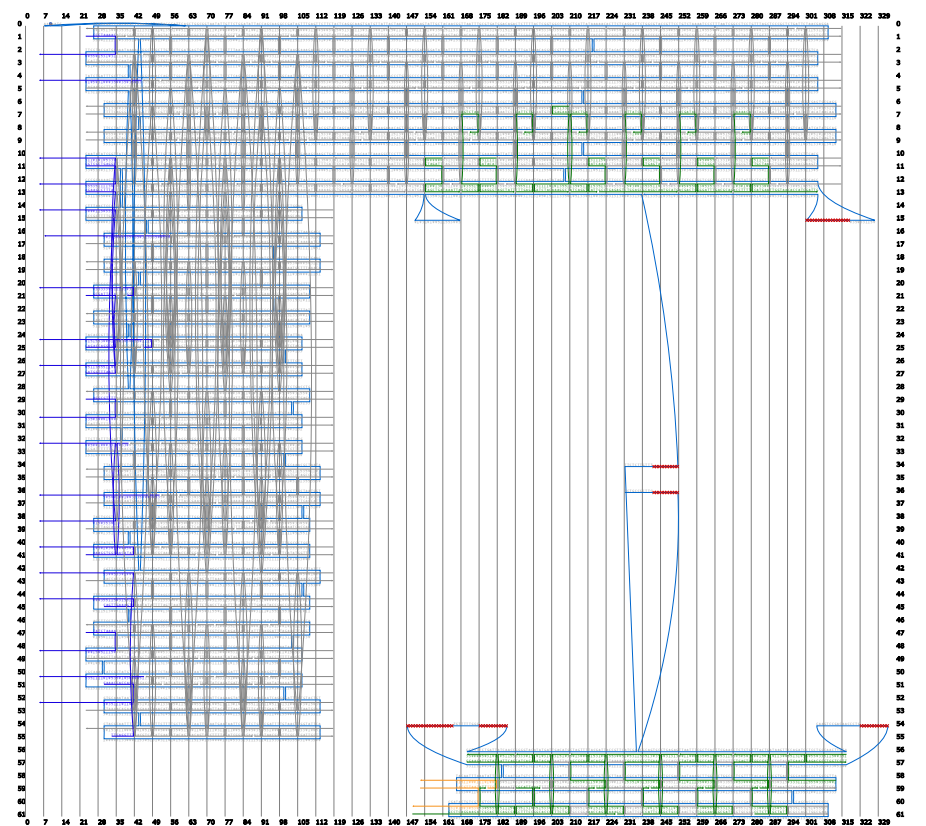

nc3&amp;6

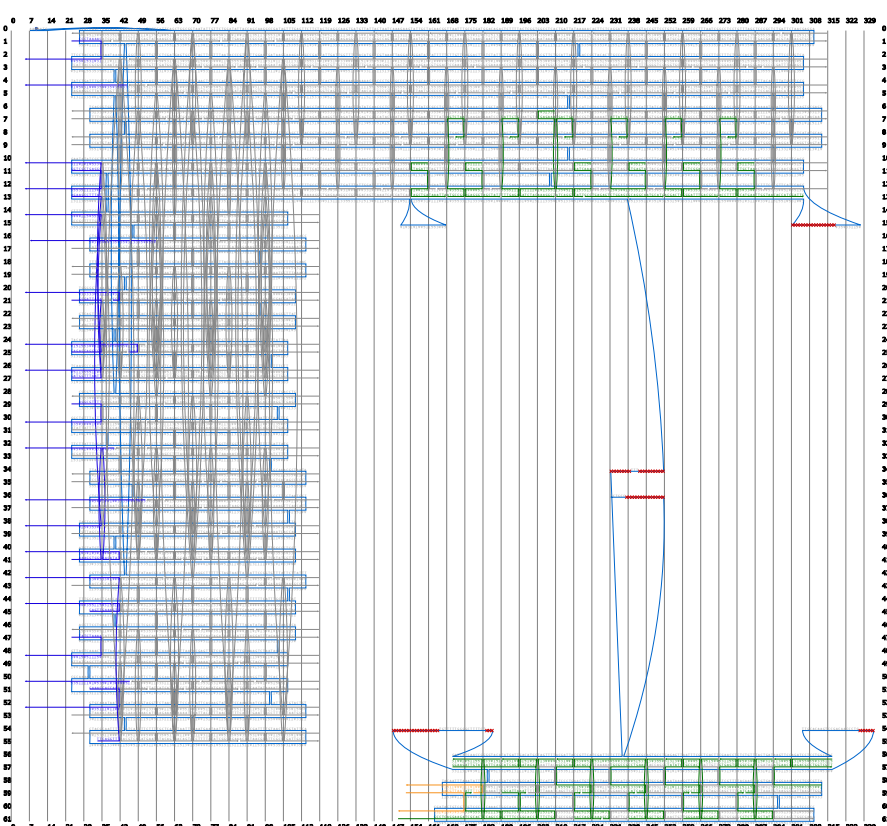

HJ

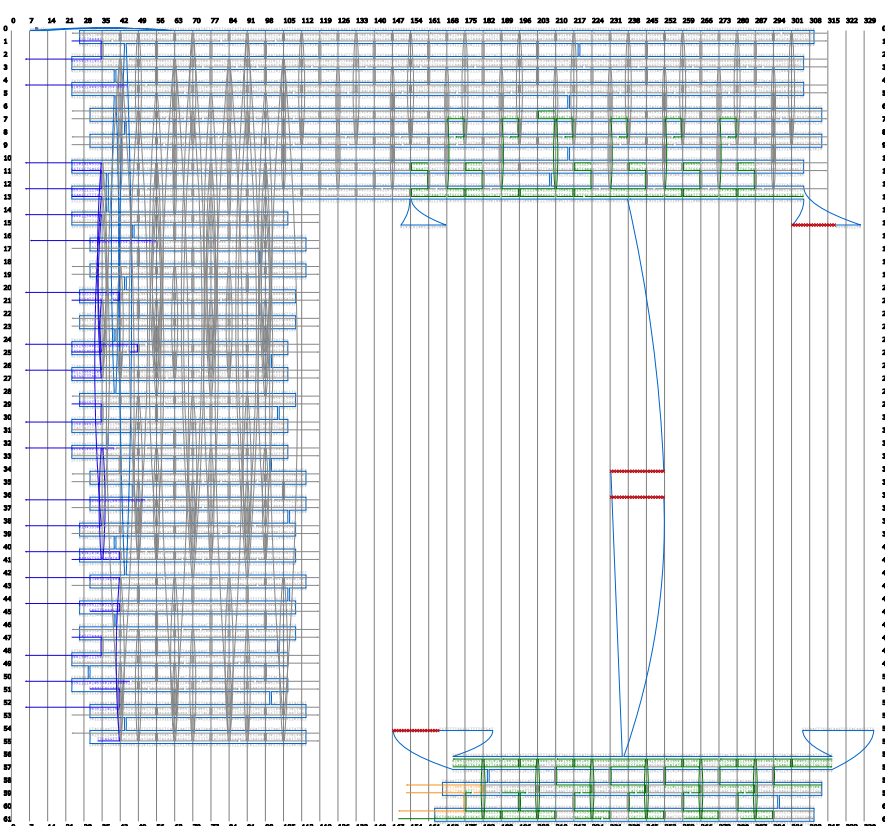

**Supplementary Information Figure S5: The caDNAo layout of the DNA origami design.** The staple oligonucleotides are sorted into different groups: core oligonucleotides (grey), biotin docking oligonucleotides (blue), and oligonucleotides to adjust spacers (green). Handle positions are marked in the c6 spacer design. Scaffold added position (arrow), dyes labeling position are same as indicated in c3 for all designs.

c3

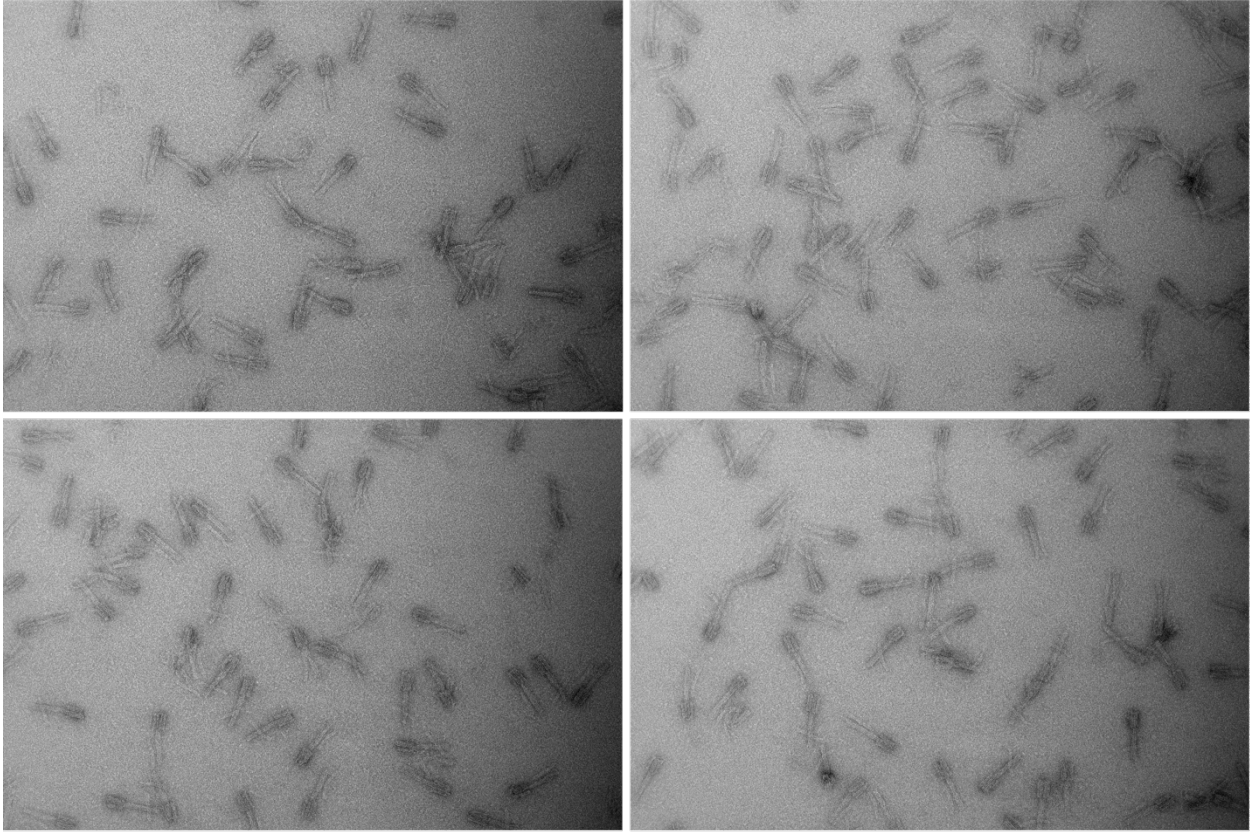

200 nm

c6

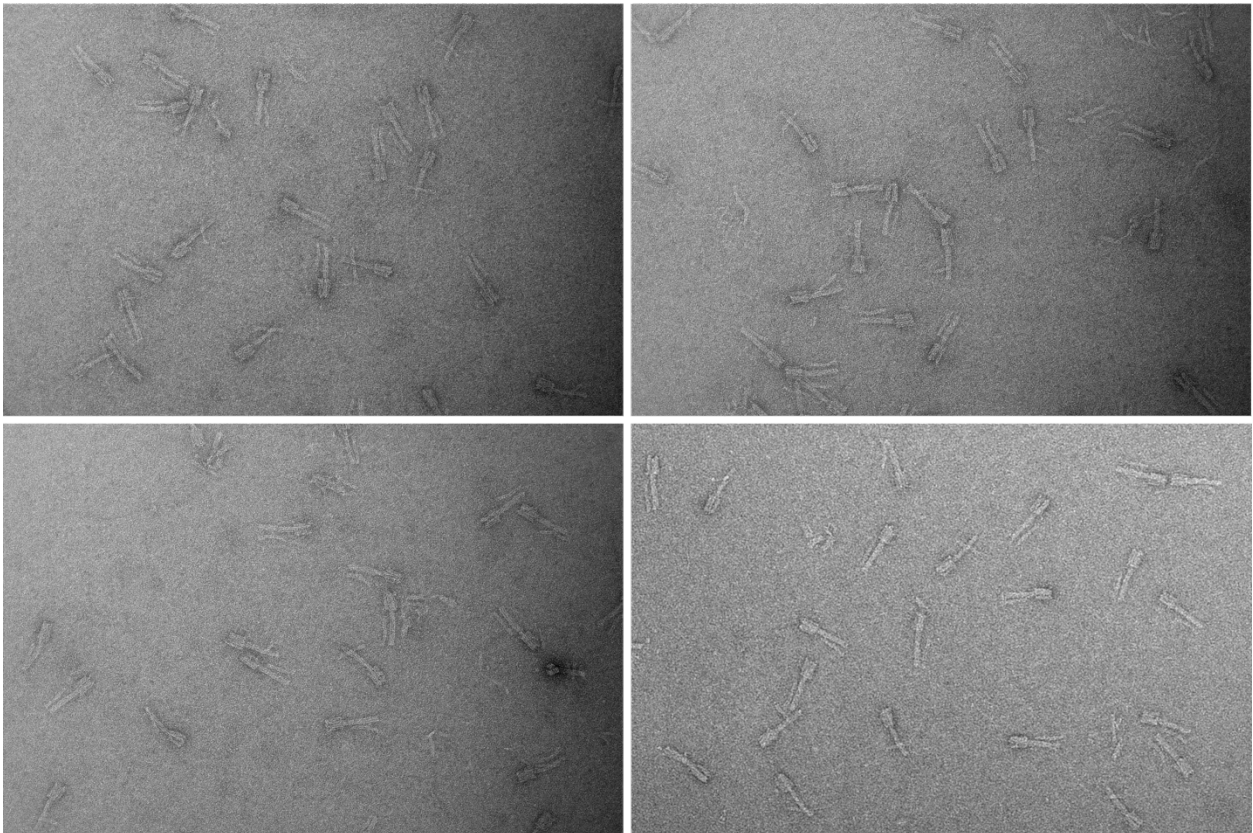

200 nm

**c11**

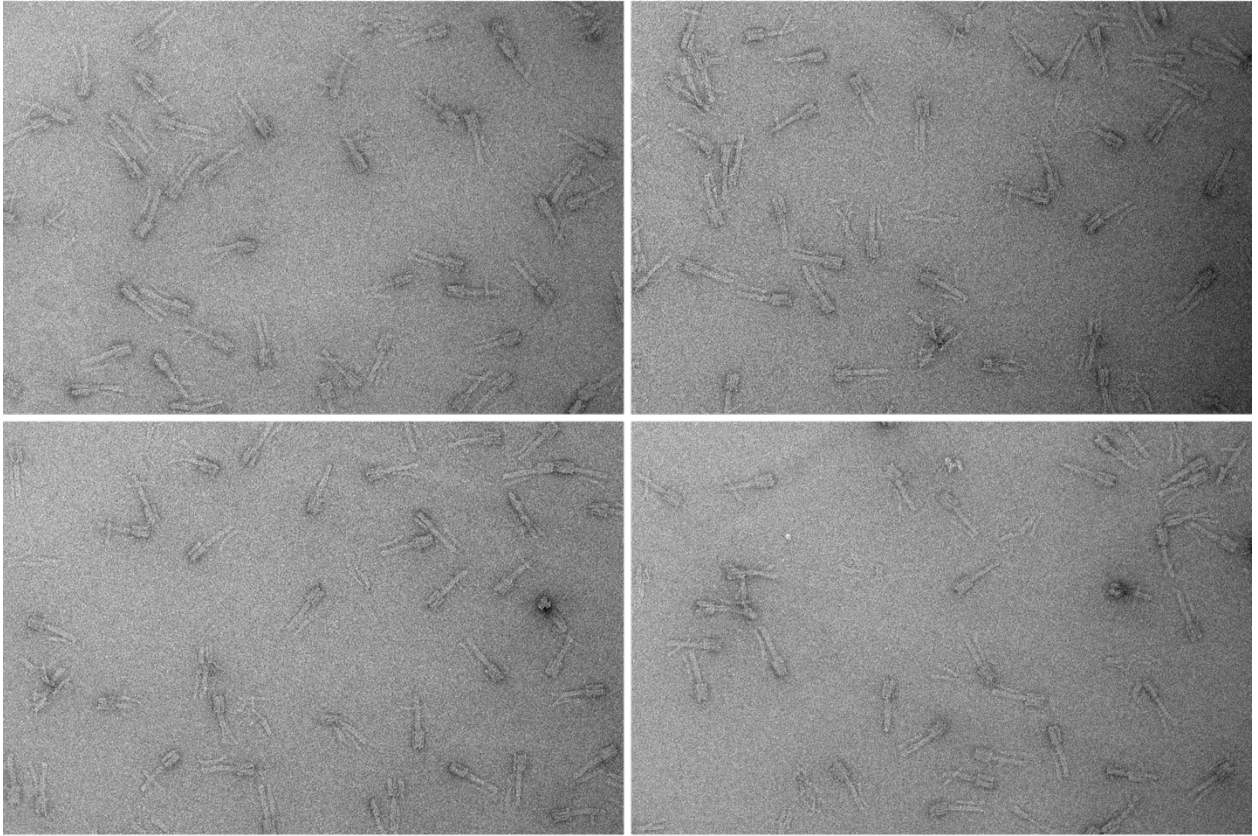

**200 nm**

**HJ**

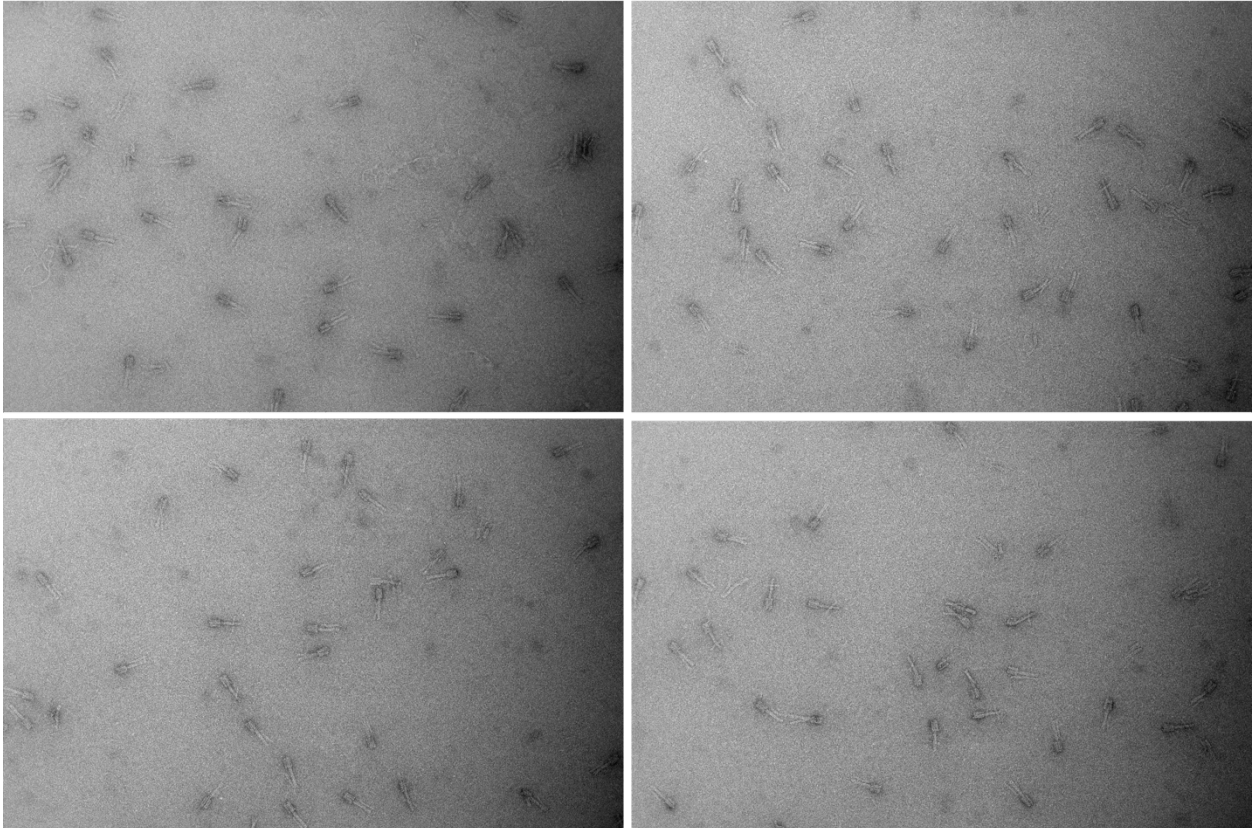

**200 nm**

nc3

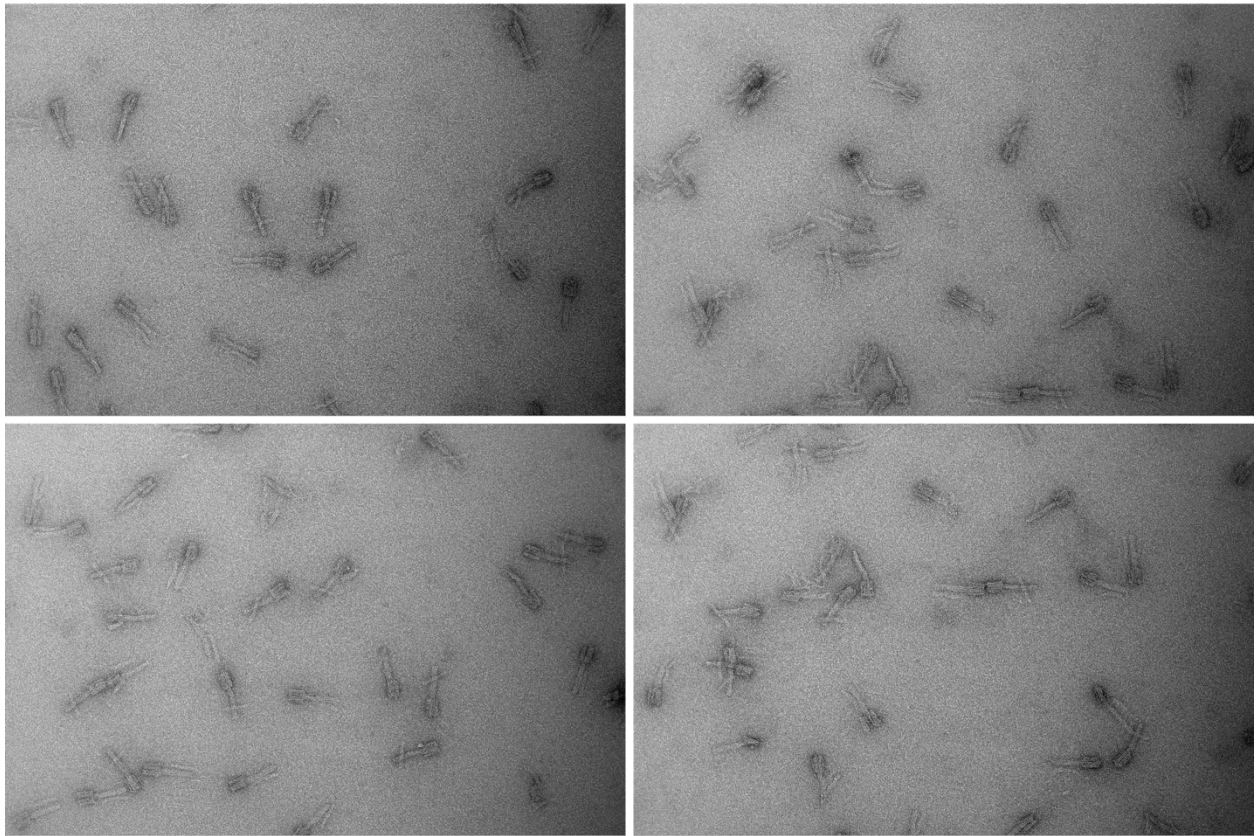

200 nm

nc6

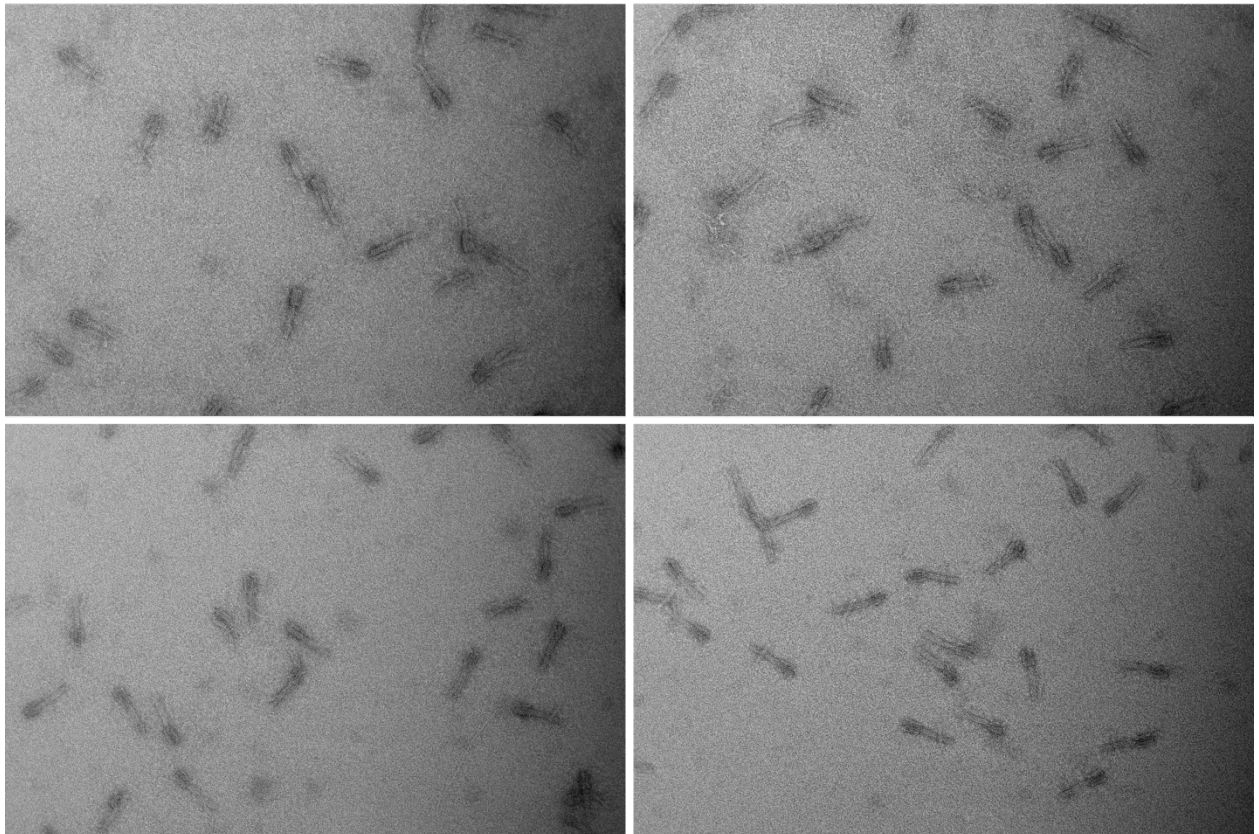

200 nm

nc11

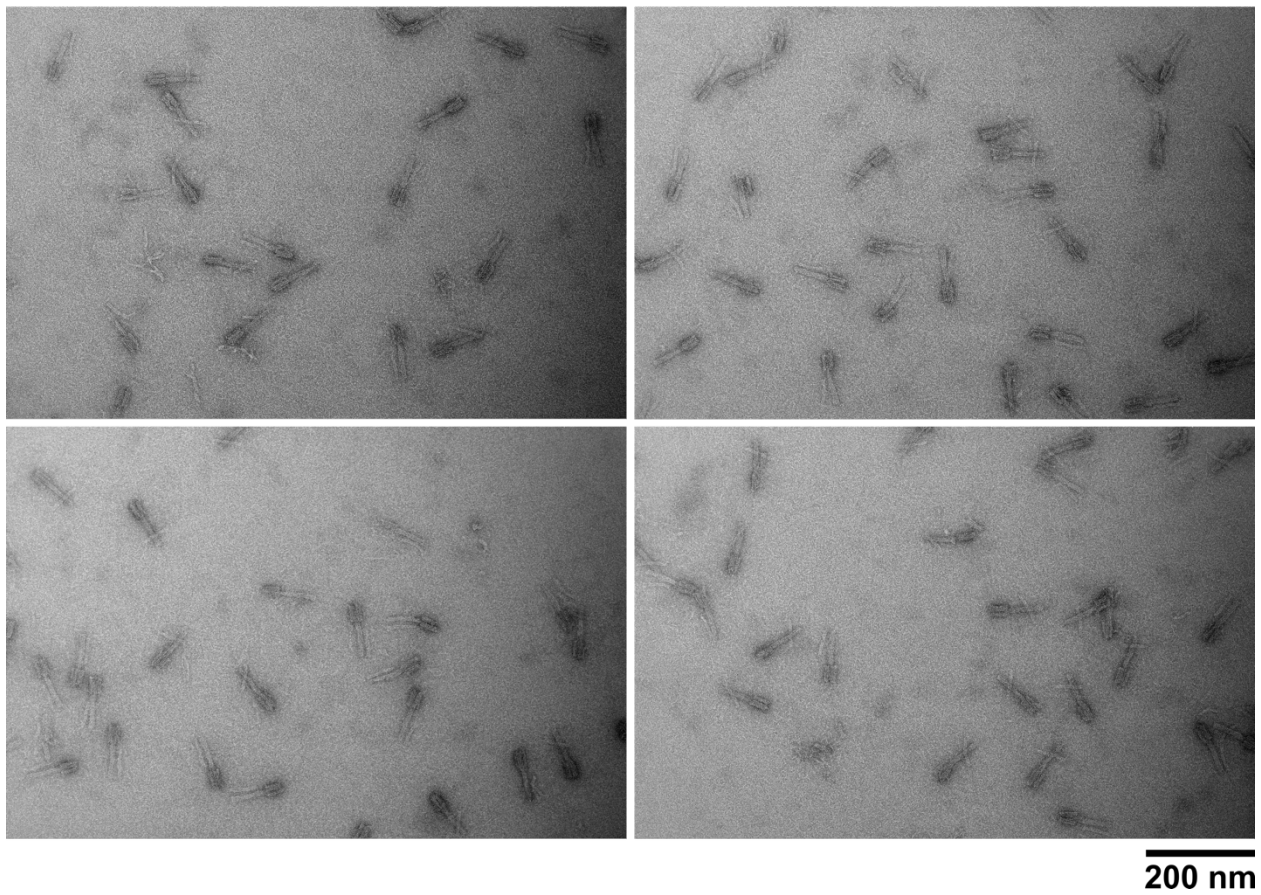

**Supplementary Information Figure S6:** TEM images of origami structures containing different kinds of spacer. Due to the negatively staining and drying effect, samples didn't show any angle distribution.

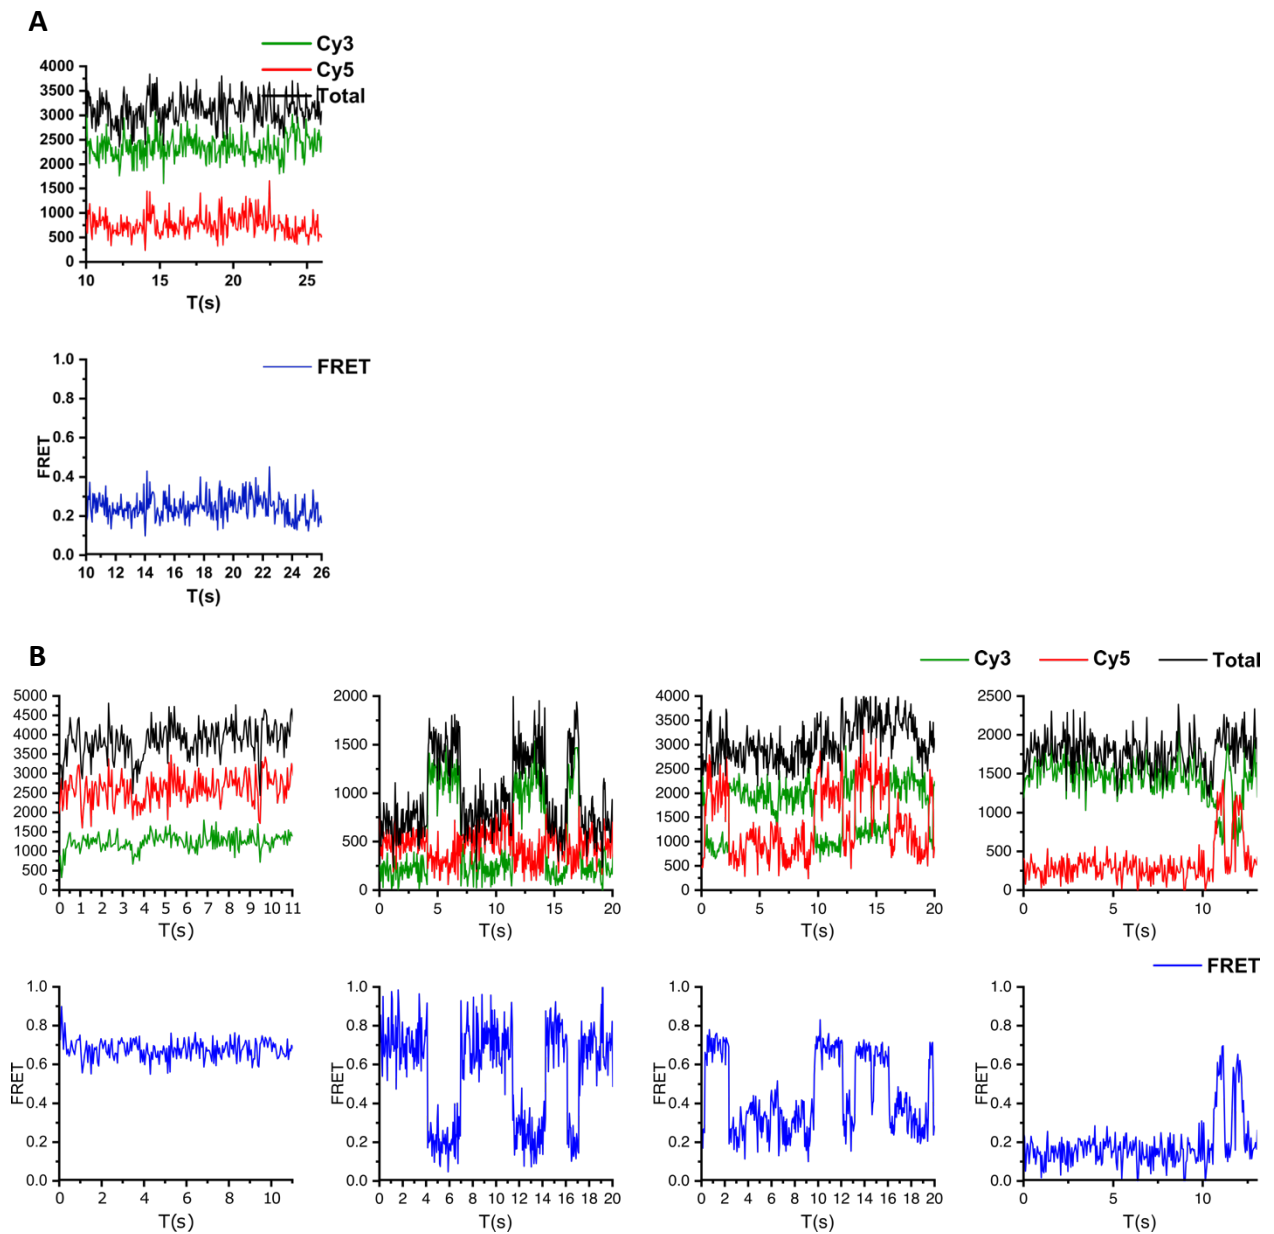

**Supplementary Information Figure S7:** Selected fluorescence traces for c6 complementary spacer at the initiate state (A) and after adding block strand (B).

### Handles and Lock/Antilock sequences:

|                                   |                                                         |
|-----------------------------------|---------------------------------------------------------|
| Handles on 13 <sup>th</sup> helix | 5'-GTC CTT CGT TGC G - Structure                        |
| Handles on 56 <sup>th</sup> helix | Structure-TCT GGT TCA CTC GC-3'                         |
| Lock                              | 5'- ATT ATT ATT GCG AGT GAA CCA GA CGC AAC GAA<br>GGA C |
| Antilock                          | 5'- GTC CTT CGT TGC GTC TGG TTC ACT CGC AAT AAT<br>AAT  |

### The shifted P8634 scaffold for complementary spacers:

TGCCTGAGAGTTAATTTTCGCTCACTTCGAACCTCTCTGTTTACTGATAAGTTCCAGATCCTCCTGGCAACT  
TGCACAAGTCCGACAACCCTGAACGACCAGGCGTCTTCGTTTCATCTATCGGATCGCCACACTCACAACAA  
TGAGTGGCAGATATAGCCTGGTGGTTCAGGCGGCGCATTTTTATTGCTGTGTTGCGCTGTAATTTCTTA  
TTTCTGATGCTGAATCAATGATGTCTGCCATCTTTCATTAATCCCTGAACTGTTGGTTAATACGCATGAGG  
GTGAATGCGAATAATAAAGCTTGGCACTGGCCGTCGTTTTACAACGTCGTGACTGGGAAAACCCTGGCG  
TTACCCAACTTAATCGCCTTGCAGCACATCCCCCTTCGCCAGCTGGCGTAATAGCGAAGAGGCCCGCAC  
CGATCGCCCTTCCCAACAGTTGCGCAGCCTGAATGGCGAATGGCGCTTTCGCTGGTTTCCGGCACCAGA  
AGCGGTGCCGAAAGCTGGCTGGAGTGCATCTTCTGAGGCCGATACTGTCGTCGTCCCCTCAAACCTG  
GCAGATGCACGGTTACGATGCGCCCATCTACACCAACGTGACCTATCCATTACGGTCAATCCGCCGTTT  
GTTCCACGGAGAATCCGACGGGTTGTTACTCGCTCACATTAATGTTGATGAAAGCTGGCTACAGGAA  
GGCCAGACGCGAATTATTTTTGATGGCGTTCCTATTGGTTAAAAAATGAGCTGATTTAACAAAAATTTAA  
TGCGAATTTAACAAAATATTAACGTTTACAATTTAAATATTTGCTTATACAATCTTCTGTTTTTGGGGCT  
TTTCTGATTATCAACCGGGGTACATATGATTGACATGCTAGTTTTACGATTACCGTTCATCGATTCTCTTG  
TTTGCTCCAGACTCTCAGGCAATGACCTGATAGCCTTTGTAGATCTCTCAAAAATAGCTACCCTCTCCGGC  
ATTAATTTATCAGCTAGAACGGTTGAATATCATATTGATGGTGATTTGACTGTCTCCGGCCTTTCTCACCC  
TTTTGAATCTTTACCTACACATACTCAGGCATTGCATTTAAAATATATGAGGGTTCTAAAAATTTTTATCC  
TTGCGTTGAAATAAAGCTTCTCCCGCAAAAGTATTACAGGGTCATAATGTTTTTGGTACAACCGATTTA  
GCTTTATGCTCTGAGGCTTTATTGCTTAATTTTGCTAATCTTTGCCTTGCCTGTATGATTTATTGGATGTT  
AATGCTACTACTATTAGTAGAATTGATGCCACCTTTTCAGCTCGCGCCCCAAATGAAAATATAGCTAAAC  
AGGTTATTGACCATTTGCGAAATGTATCTAATGGTCAAACCTAAATCTACTCGTTTCGAGAATTGGGAATC  
AACTGTTATATGGAATGAAACTTCCAGACACCGTACTTTAGTTGCATATTTAAAACATGTTGAGCTACAG  
CATTATATTCAGCAATTAAGCTCTAAGCCATCCGCAAAAATGACCTCTTATCAAAGGAGCAATTAAGG  
TACTCTCTAATCCTGACCTGTTGGAGTTTGTCCGGTCTGGTTCGCTTTGAAGCTCGAATTAACCGCGA  
TATTTGAAGTCTTTCCGGCTTCTCTTAATCTTTTTGATGCAATCCGCTTTGCTTCTGACTATAATAGTCAG  
GGTAAAGACCTGATTTTTGATTTATGGTCATTCTCGTTTTCTGAACTGTTTAAAGCATTTGAGGGGGATT  
AATGAATATTTATGACGATTCCGCAGTATTGGACGCTATCCAGTCTAAACATTTTACTATTACCCCTCTG



GCAAAACTTCTTTTGCAAAGCCTCTCGCTATTTTGGTTTTATCGTCGTCTGGTAAACGAGGGTTATGAT  
AGTGTGCTCTTACTATGCCTCGTAATTCCTTTGGCGTTATGTATCTGCATTAGTTGAATGTGGTATTCCT  
AAATCTCAACTGATGAATCTTTCTACCTGTAATAATGTTGTTCCGTTAGTTTCGTTTTATTAACGTAGATTTT  
TCTTCCCAACGTCCTGACTGGTATAATGAGCCAGTCTTAAAATCGCATAAGGTAATTCACAATGATTAA  
AGTTGAAATTAACCATCTCAAGCCCAATTTACTACTCGTTCGGTGTTCGTCAGGGCAAGCCTTATT  
CACTGAATGAGCAGCTTTGTTACGTTGATTTGGGTAATGAATATCCGGTTCCTGTCAAGATTACTCTTGAT  
GAAGGTCAGCCAGCCTATGCGCCTGGTCTGTACACCGTTCATCTGTCTCTTTCAAAGTTGGTCAGTTCCG  
GTTCCCTTATGATTGACCGTCTGCGCCTCGTTCGGCTAAGTAACATGGAGCAGGTCGCGGATTTGACAC  
CAATTTATCAGGCGATGATACAAATCTCCGTTGACTTTGTTTCGCGCTTGGTATAATCGCTGGGGGTCA  
AAGATGAGTGTTCAGTATTCTTTGCTCTTTGTTTTAGGTTGGTGCCTTCGTAGTGGCATTACGTA  
TTTTACCCGTTAATGGAACTTCCTCATGAAAAAGTCTTTAGTCCTCAAAGCCTCTGTAGCCGTTGCTAC  
CCTCGTTCGGATGCTGTCTTTGCTGCTGAGGGTGACGATCCCGCAAAGCGGCCTTTAACTCCCTGCAA  
GCCTCAGCGACCGAATATATCGGTTATGCGTGGGCGATGGTTGTTGTCATTGTGCGCGCAACTATCGGT  
ATCAAGCTGTTAAGAAATTCACCTCGAAAGCAAGCTGATAAACCGATACAATTAAGGCTCCTTTTGA  
GCCTTTTTTTGGAGATTTTCAACGTGAAAAAATTATTATTCGCAATTCCTTTAGTTGTTCTTTCTATTCTC  
ACTCCGCTGAAACTGTTGAAAGTTGTTTAGCAAAATCCCATACAGAAAATTCATTTACTAACGTCTGGAA  
AGACGACAAAACCTTAGATCGTTACGCTAACTATGAGGGCTGTCTGTGGAATGCTACAGGCGTTGTAGT  
TTGTACTGGTGACGAACTCAGTGTACGGTACATGGGTTCTATTGGGCTTGTATCCCTGAAAATGAG  
GGTGGTGGCTCTGAGGGTGGCGGTTCTGAGGGTGGCGGTTCTGAGGGTGGCGGTTACTAAACCTCTGA  
GTACGGTGATACACCTATTCCGGGCTATACTTATATCAACCCTCTCGACGGCACTTATCCGCCTGGTACTG  
AGCAAACCCCGTAATCCTAATCCTTCTTTGAGGAGTCTCAGCCTCTAATACTTTTCATGTTTCAGAAT  
AATAGGTTCCGAAATAGGCAGGGGGCATTAACTGTTTATACGGGCACTGTTACTCAAGGCACTGACCCC  
GTTAAAACCTTATTACCAGTACACTCCTGTATCATCAAAGCCATGTATGACGCTTACTGGAACGGTAAAT  
TCAGAGACTGCGCTTCCATTCTGGCTTAAATGAGGATTTATTTGTTTGTGAATATCAAGGCCAATCGTCT  
GACCTGCCTCAACCTCCTGTCAATGCTGGCGGCGCTCTGGTGGTGGTTCTGGTGGCGGCTCTGAGGGT  
GGTGGCTCTGAGGGTGGCGGTTCTGAGGGTGGCGGCTCTGAGGGAGGCGGTTCCGGTGGTGGCTCTG  
GTTCCGGTGATTTTGATTATGAAAAGATGGCAAACGCTAATAAGGGGGCTATGACCGAAAATGCCGATG  
AAAACGCGCTACAGTCTGACGCTAAAGGCAAACCTTGATTCTGTGCTACTGATTACGGTGCTGCTATCGA  
TGGTTTCATTGGTGACGTTTCCGGCCTTGCTAATGGTAATGGTGCTACTGGTGATTTTGCTGGCTCTAATT  
CCCAAATGGCTCAAGTCGGTGACGGTGATAATCACCTTAAATGAATAATTTCCGTCAATATTTACCTTCC  
CTCCCTCAATCGGTTGAATGTGCCCCTTTGTCTTTGGCGCTGGTAAACCATATGAATTTTCTATTGATTG  
TGACAAAATAAACTTATTCCGTGGTGTCTTTGCGTTTCTTTATATGTTGCCACCTTTATGTATGATTTTC  
TACGTTTGCTAACATACTGCGTAATAAGGAGTCTAATCATGCCAGTTCCTTTGGGTATTCCGTTATTATT  
GCGTTTCTCGGTTTCTTCTGGTAACTTTGTTTCGGCTATCTGCTTACTTTTCTAAAAAGGGCTTCGGTAA  
GATAGCTATTGCTATTTCAATGTTTCTTGTCTTATTATTGGGCTTAACTCAATTCCTGTGGGTTATCTCTCT  
GATATTAGCGCTCAATTACCCTCTGACTTTGTTTCAGGGTGTTCAGTTAATTCTCCCGTCAATGCGCTTCC  
CTGTTTTTATGTTATTCTCTCTGTAAAGGCTGCTATTTTCATTTTTGACGTTAAACAAAAAATCGTTTCTTA  
TTTGGATTGGGATAAATAATATGGCTGTTTATTTTGTAACTGGCAAATTAGGCTCTGGAAAGACGCTCGT  
TAGCGTTGGTAAGATTAGGATAAAATTGTAGCTGGGTGCAAATAGCAACTAATCTTGATTTAAGGCT  
TCAAACCTCCCGCAAGTCGGGAGGTTGCTAAAACGCCTCGCGTTCCTAGAATACCGGATAAGCCTTCT  
ATATCTGATTTGCTTGTATTGGGCGCGGTAATGATTCCTACGATGAAAATAAAAACGGCTTGCTTGTTTC  
TCGATGAGTGCGGTACTTGGTTTAAACCCGTTCTTGAATGATAAGGAAAGACAGCCGATTATTGATT  
GGTTTCTACATGCTCGTAAATTAGGATGGGATATTATTTTTCTTGTTCAGGACTTATCTATTGTTGATAAA  
CAGGCGCGTTCGTGATTAGCTGAACATGTTGTTTATTGTGCTGCTGGACAGAATTACTTTACCTTTTGT

CGGTACTTTATATTCTTATTACTGGCTCGAAAATGCCTCTGCCTAAATTACATGTTGGCGTTGTTAAAT  
ATGGCGATTCTCAATTAAGCCCTACTGTTGAGCGTTGGCTTTATACTGGTAAGAATTTGTATAACGCATA  
TGATACTAACAGGCTTTTTCTAGTAATTATGATTCCGGTGTTTATTCTTATTTAACGCCTATTTATCACA  
CGGTCCGGTATTTCAAACCATTAAATTTAGGTCAGAAGATGAAATTAATAAAATATATTTGAAAAAGTTT  
TCTCGCGTCTTTGTCTTGCATTGGATTTGCATCAGCATTACATATAGTTATATAACCCAACCTAAGCC  
GGAGGTTAAAAAGGTAGTCTCTCAGACCTATGATTTTGATAAATCACTATTGACTCTTCTCAGCGTCTTA  
ATCTAAGCTATCGCTATGTTTTCAAGGATTCTAAGGGAAAATTAATTAATAGCGACGATTTACAGAAGCA  
AGGTTATCACTCACATATATTGATTTATGTAAGTTTCCATTAATAAAAGGTAATCAAATGAAATTGTTA  
AATGTAATTAATTTGTTTTCTTGATGTTTGTTCATCATCTTCTTTGCTCAGGTAATTGAAATGAATAAT  
TCGCCTCTGCGGATTTTGTAACTGGTATTCAAAGCAATCAGGCCAATCCGTTATTGTTTCTCCCGATGT  
AAAAGGTACTGTTACTGTATATTCATCTGACGTTAAACCTGAAAATCTACGCAATTTCTTATTTCTGTTTT  
ACGTGCAAATAATTTGATATGGTAGGTTCTAACCTTCCATTATTCAGAAGTATAATCCAAACAATCAG  
GATTATATTGATGAATTGCCATCATCTGATAATCAGGAATATGATGATAATTCCGCTCCTTCTGGTGGTTT  
CTTTGTTCCGCAAATGATAATGTTACTCAAACCTTTTAAAATTAATAACGTTCCGGCAAAGGATTTAATAC  
GAGTTGTCGAATTGTTGTAAAGTCTAATACTTCTAAATCCTCAAATGTATTATCTATTGACGGCTCTAAT  
CTATTAGTTGTTAGTGCTCCTAAAGATATTTAGATAACCTTCTCAATTCCTTTCAACTGTTGATTTGCCA  
ACTGACCAGATATTGATTGAGGGTTTGATATTTGAGGTTCCAGCAAGGTGATGCTTTAGATTTTTCAATTTG  
CTGCTGGCTCTCAGCGTGGCACTGTTGCAGGCGGTGTTAATACTGACCGCCTCACCTCTGTTTTATCTTCT  
GCTGGTGGTTCGTTCCGGTATTTTTAATGGCGATGTTTTAGGGCTATCAGTTCGCGCATTAAAGACTAATA  
GCCATTCAAAAATATTGTCTGTGCCACGTATTCTTACGCTTTCAGGTCAGAAGGGTTCTATCTCTGTTGGC  
CAGAATGTCCCTTTTATTACTGGTCGTGACTGGTGAATCTGCCAATGTAAATAATCCATTTACAGACGAT  
TGAGCGTCAAATGTAGGTATTTCCATGAGCGTTTTTCTGTTGCAATGGCTGGCGGTAATATTGTTCTG  
GATATTACCAGCAAGGCCGATAGTTTGAGTTCTTCTACTCAGGCAAGTGATGTTATTACTAATCAAAGAA  
GTATTGCTACAACGGTTAATTTGCGTGATGGACAGACTCTTTTACTCGGTGGCCTCACTGATTATAAAAA  
CACTTCTCAGGATTCTGGCGTACCGTTCCTGTCTAAAATCCCTTAAATCGGCCTCCTGTTTAGCTCCCGCTC  
TGATTCTAACGAGGAAAGCACGTTATACGTGCTCGTCAAAGCAACCATAGTACGCGCCCTGTAGCGGGC  
CATTAAAGCGCGGGGTGTGGTGGTTACGCGCAGCGTGACCGCTACACTTGCCAGCGCCCTAGCGCCC  
GCTCCTTTGCTTTCTTCCCTTCTTCTCGCCACGTTCCGGGCTTTCCCGTCAAGCTCTAAATCGGGGG  
CTCCCTTAGGGTTCCGATTTAGTGCTTTACGGCACCTCGACCCAAAAAATTTGATTTGGGTGATGGTTC  
ACGTAGTGGGCCATCGCCCTGATAGACGGTTTTTCCGCCCTTGACGTTGGAGTCCACGTTCTTTAATAGT  
GGACTCTTGTTCAAACTGGAACAACACTCAACCCTATCTCGGGCTATTCTTTGATTTATAAGGGATTTT  
GCCGATTTCCGAACCACCATCAAACAGGATTTTGCCTGCTGGGGCAAACCAGCGTGACCGCTTGCTG  
CAACTCTCTCAGGGCCAGGCGGTGAAGGGCAATCAGCTGTTGCCCGTCTCACTGGTGAAAAGAAAACC  
ACCCTGGCGCCAATACGCAAACCGCCTCTCCCGCGCGTTGGCCGATTCATTAATGCAGCTGGCACGAC  
AGGTTTCCCGACTGGAAAGCGGGCAGTGAGCGCAACGCAATTAATGTGAGTTAGCTCACTCATTAGGCA  
CCCCAGGCTTTACACTTTATGCTTCCGGCTCGTATGTTGTGTGGAATTGTGAGCGGATAACAATTTACA  
CAGGAAACAGCTATGACCATGATTACGAATTCGAGCTCGGTACCCGGGGATCCATTCTCCTGTGACTCG  
GAAGTGCAATTTATCATCTCCATAAAAACAAAACCCGCCGTAGCGAGTTCAGATAAAATAAATCCCCGCGA  
GTGCGAGGATTGTTATGTAATATTGGGTTAATCATCTATATGTTTTGTACAGAGAGGGCAAGTATCGTT  
TCCACCGTACTCGTGATAATAATTTTGCACGGTATCAGTCATTTCTCGCACATTGCAGAATGGGGATTTGT  
CTTCATTAGACTTATAAACCTTCATGGAATATTTGTATGCCGACTCTATATCTATACCTTCATCTACATAAA  
CACCTTCGTGATGCTGCATGGAGACAAGACACCGGATCTGCACAACATTGATAACGCCCAATCTTTTTG  
CTCAGACTCTAACTCATTGATACTCATTTATAAACTCCTTGAATGTATGTCGTTTCAGCTAAACGGTATC  
AGCAATGTTTATGTAAGAAACAGTAAGATAATACTCAACCCGATGTTTGAGTACGGTTCATCATCTGACA

CTACAGACTCTGGCATCGCTGTGAAGACGACGCGAAATTCAGCATTTTCACAAGCGTTATCTTTTACAAA  
ACCGATCTCACTCTCCTTTGATGCGAATGCCAGCGTCAGACATCATATGCAGATACTCACCTGCATCCTG  
AACCATTGACCTCCAACCCCGTAATAGCGATGCGTAATGATGTGATAGTTACTAACGGGTCTTGTTTCG  
ATTAAGTCCCGCAGAACTCTTCCAGGTACCAAGTGCAGTGCTTGATAACAGGAGTCTTCCCAGGATGG  
CGAACAAACAAGAACTGGTTTCCGTCTTACGGACTTCGTTGCTTCCAGTTTAGCAATACGCTTACTCCC  
ATCCGAGATAACACCTTCGTAATACTCACGCTGCTCGTTGAGTTTTGATTTTGCTGTTTCAAGCTCAACAC  
GCAGTTTCCCTACTGTTAGCGCAATATCCTCGTTCTCCTGGTCGCGGCGTTTGATGTATTGCTGGTTTCTT  
TCCCGTTCATCCAGCAGTTCAGCACAAATCGATGGTGTTACCAATTCATGGAAAAGGTCTGCGTCAAATC  
CCCAGTCGTCATGCATTGCCTGCTCTGCCGCTTACGCGAG

**The shifted P8634 scaffold for non-complementary spacers:**

TCTGCCGCTTCACGCAGTGCCTGAGAGTTAATTCGCTCACTTCGAACCTCTCTGTTTACTGATAAGTTCC  
AGATCCTCCTGGCAACTTGCACAAGTCCGACAACCCTGAACGACCAGGCGTCTTCGTTTCATCTATCGGAT  
CGCCACACTCACAACAATGAGTGGCAGATATAGCCTGGTGGTTCAGGCGGCGCATTTCATTTGCTGTGTT  
GCGCTGTAATTCTTCTATTTCTGATGCTGAATCAATGATGTCTGCCATCTTTCATTAATCCCTGAACTGTTG  
GTTAATACGCATGAGGGTGAATGCGAATAATAAAGCTTGGCACTGGCCGTCGTTTTACAACGTCGTGAC  
TGGGAAAACCCTGGCGTTACCCAACCTAATCGCCTTGCAGCACATCCCCCTTCGCCAGCTGGCGTAATA  
GCGAAGAGGGCCCGCACCGATCGCCCTCCCAACAGTTGCGCAGCCTGAATGGCGAATGGCGCTTTGCCT  
GGTTCCGGCACCAGAAGCGGTGCCGAAAGCTGGCTGGAGTGCATCTTCTGAGGCCGATACTGTC  
GTCGTCCCCTCAAACCTGGCAGATGCACGGTTACGATGCGCCCATCTACACCAACGTGACCTATCCCATTA  
CGGTCAATCCGCCGTTTGTCCACGGAGAATCCGACGGGTTGTTACTCGCTCACATTTAATGTTGATGA  
AAGCTGGCTACAGGAAGGCCAGACGCGAATTATTTTGATGGCGTTCCTATTGGTTAAAAAATGAGCTG  
ATTTAACAAAAATTTAATGCGAATTTTAACAAAATATTAACGTTTACAATTTAATATTTGCTTATAACAATC  
TTCCTGTTTTTGGGGCTTTTCTGATTATCAACCGGGGTACATATGATTGACATGCTAGTTTTACGATTACC  
GTTTCATCGATTCTTGTGTTGCTCCAGACTCTCAGGCAATGACCTGATAGCCTTTGTAGATCTCTCAAAAA  
TAGCTACCCTCTCCGGCATTAAATTTATCAGCTAGAACGGTTGAATATCATATTGATGGTGATTTGACTGTC  
TCCGGCCTTTCTCACCTTTTGAATCTTACCTACACATTACTCAGGCATTGCATTTAAAATATATGAGGGT  
TCTAAAAATTTTTATCCTTGCCTTGAATAAAGGCTTCTCCCGCAAAGTATTACAGGGTCATAATGTTTT  
TGGTACAACCGATTTAGCTTTATGCTCTGAGGCTTTATTGCTTAATTTTGTAAATTTTGCCTTGCCTGTA  
TGATTTATTGGATGTTAATGCTACTACTATTAGTAGAATTGATGCCACCTTTTCAGCTCGCGCCCCAAATG  
AAAATATAGCTAAACAGGTTATTGACCATTTGCGAAATGTATCTAATGGTCAAACCTAAATCTACTCGTTC  
GCAGAATTGGGAATCAACTGTTATATGGAATGAACTTCCAGACACCGTACTTTAGTTGCATATTTAAAA  
CATGTTGAGCTACAGCATTATATTCAGCAATTAAGCTCTAAGCCATCCGCAAAAATGACCTCTTATCAAA  
AGGAGCAATTAAGGTAATCTCTAATCCTGACCTGTTGGAGTTTGTCTCCGGTCTGGTTGCTTTGAAGC  
TCGAATTAACCGGATATTTGAAGTCTTTCGGGCTTCTCTTAATCTTTTTGATGCAATCCGCTTTGCTTC  
TGACTATAATAGTCAGGGTAAAGACCTGATTTTTGATTTATGGTCAATCTCGTTTTCTGAACTGTTTAAAG  
CATTTGAGGGGGATTCAATGAATATTTATGACGATTCCGAGTATTGGACGCTATCCAGTCTAAACATTT  
TACTATTACCCCTCTGGCAAACTTCTTTTGCAAAGCCTCTCGCTATTTTTGGTTTTTATCGTCGTCTGGT  
AAACGAGGGTTATGATAGTGTGCTTACTATGCCTCGTAATTCCTTTTGGCGTTATGTATCTGCATTAG  
TTGAATGTGGTATTCCTAAATCTCAACTGATGAATCTTCTACCTGTAATAATGTTGTTCCGTTAGTTCGTT  
TTATTAACGTAGATTTTTCTTCCCAACGTCTGACTGGTATAATGAGCCAGTTCCTTAAATCGCATAAGGT  
AATTCACAATGATTAAGTTGAAATTAACCATCTCAAGCCCAATTTACTACTCGTTCTGGTGTTCCTCGT  
CAGGGCAAGCCTTATTCACTGAATGAGCAGCTTTGTTACGTTGATTTGGGTAATGAATATCCGGTTCTTG  
TCAAGATTACTCTTGATGAAGGTCAGCCAGCCTATGCGCCTGGTCTGTACACCGTTCATCTGTCCTCTTC  
AAAGTTGGTCAGTTCGGTTCCTTATGATTGACCGTCTGCGCCTCGTTCGGCTAAGTAACATGGAGCAG  
GTCGCGGATTTGACACAATTTATCAGGCGATGATACAAATCTCCGTTGTTACTTTGTTTCGCGCTTGGTAT  
AATCGCTGGGGTCAAAGATGAGTGTGTTTGTGTTTCTTTGCTCTTTGTTTTAGGTTGGTGCCTTCG  
TAGTGGCATTACGTATTTTACCCGTTTAAATGGAACTTCTCATGAAAAAGTCTTTAGTCTCAAAGCCTC  
TGTAGCCGTTGCTACCCTCGTTCGATGCTGTCTTTGCTGCTGAGGGTGACGATCCCGCAAAGCGGCC  
TTTAACTCCCTGCAAGCCTCAGCGACCGAATATATCGGTTATGCGTGGGCGATGGTTGTTGTCATTGTCG  
GCGCAACTATCGGTATCAAGCTGTTTAAAGAAATTCACCTCGAAAGCAAGCTGATAAACCGATACAATTA  
AGGCTCCTTTTGGAGCCTTTTTTTTTGGAGATTTTCAACGTGAAAAAATTATTATTCGCAATTCCTTTAGTT  
GTTCTTTCTATTCTCACTCCGCTGAAACTGTTGAAAGTTGTTTAGCAAAATCCCATACAGAAAATTCATT

TACTAACGTCTGGAAAGACGACAAAACCTTTAGATCGTTACGCTAACTATGAGGGCTGTCTGTGGAATGC  
TACAGGCGTTGTAGTTTGTACTGGTGACGAAACTCAGTGTTACGGTACATGGGTTCTATTGGGCTTGCT  
ATCCCTGAAAATGAGGGTGGTGGCTCTGAGGGTGGCGGTTCTGAGGGTGGCGGTTCTGAGGGTGGCG  
GTACTAAACCTCCTGAGTACGGTGATACACCTATTCCGGGCTATACTTATATCAACCCTCTCGACGGCACT  
TATCCGCCTGGTACTGAGCAAACCCCGCTAATCCTAATCCTTCTTTGAGGAGTCTCAGCCTCTTAATAC  
TTTCATGTTTCAGAATAATAGGTTCCGAAATAGGCAGGGGGCATTAACTGTTTATACGGGCACTGTTACT  
CAAGGCACTGACCCCGTTAAACTTATTACCAGTACACTCCTGTATCATCAAAGCCATGTATGACGCTT  
ACTGGAACGGTAAATTCAGAGACTGCGCTTTCATTCTGGCTTAAATGAGGATTTATTTGTTTGTGAATAT  
CAAGGCCAATCGTCTGACCTGCCTCAACCTCCTGTCAATGCTGGCGGCGGCTCTGGTGGTGGTTCTGGT  
GGCGGCTCTGAGGGTGGTGGCTCTGAGGGTGGCGGTTCTGAGGGTGGCGGCTCTGAGGGAGGCGGTT  
CCGGTGGTGGCTCTGGTCCGGTGATTTTGATTATGAAAAGATGGCAAACGCTAATAAGGGGGCTATGA  
CCGAAAATGCCGATGAAAACGCGCTACAGTCTGACGCTAAAGGCAAACCTTGATTCTGTGCTACTGATT  
ACGGTGTCTATCGATGGTTTCATTGGTGACGTTTCCGGCCTTGCTAATGGTAATGGTGCTACTGGTGA  
TTTTGTGGCTCTAATCCCAAATGGCTCAAGTCGGTGACGGTGATAATCACCTTAAATGAATAATTTCC  
GTCAATATTTACCTTCCCTCCCTCAATCGGTTGAATGTGCGCCTTTTGTCTTTGGCGCTGGTAAACCATAT  
GAATTTTCTATTGATTGTGACAAAATAAACTTATTCCGTGGTGTCTTTGCGTTTCTTTTATATGTTGCCACC  
TTTATGTATGTATTTTCTACGTTTGCTAACATACTGCGTAATAAGGAGTCTTAATCATGCCAGTTCTTTTG  
GGTATTCCGTTATTATTGCGTTTCCCTCGGTTTCTTCTGGTAACTTTGTTCGGCTATCTGCTTACTTTTCTTA  
AAAAGGGCTTCGGTAAGATAGCTATTGCTATTTCAATTGTTTCTTGCTCTTATTATTGGGCTTAACTCAATT  
CTTGTGGGTTATCTCTCTGATATTAGCGCTCAATTACCCTCTGACTTTGTTCCAGGGTGTTCAGTTAATTCTC  
CCGTCTAATGCGCTTCCCTGTTTTTATGTTATTCTCTCTGTAAAGGCTGCTATTTTCATTTTGACGTTAAA  
CAAAAAATCGTTTCTTATTTGGATTGGGATAAATAATATGGCTGTTTATTTTGTAACTGGCAAATTAGGCT  
CTGGAAAGACGCTCGTTAGCGTTGGTAAGATTGAGGATAAAATTGTAGCTGGGTGCAAATAGCAACTA  
ATCTTGATTTAAGGCTTCAAACCTCCCGCAAGTCGGGAGGTTGCTAAAACGCTCGCGTTCTTAGAAT  
ACCGGATAAGCCTTCTATATCTGATTTGCTTGTATTGGGCGCGGTAATGATTCTACGATGAAAATAAA  
AACGGCTTGCTTGTCTCGATGAGTGCGGTAATGGTTAATACCCGTTCTTGAATGATAAGGAAAGAC  
AGCCGATTATTGATTGTTTTCTACATGCTCGTAAATTAGGATGGGATATTATTTTTCTTGTTCAGGACTTA  
TCTATTGTTGATAAACAGGCGGTTCTGCATTAGCTGAACATGTTGTTTATTGTCGTCGTCTGGACAGAA  
TTACTTTACCTTTTGTCCGTACTTTATATTCTTATTACTGGCTCGAAAATGCCTCTGCCTAAATTACATG  
TTGGCGTTGTTAAATATGGCGATTCTCAATTAAGCCCTACTGTTGAGCGTTGGCTTTATACTGGTAAGAA  
TTTGATAACGCATATGATACTAACAGGCTTTTTCTAGTAATTATGATTCCGGTGTTTATTCTTATTTAAC  
GCCTTATTTATCACACGGTCCGTATTTCAAACCATTAATTTAGGTCAGAAGATGAAATTAATAATA  
TATTTGAAAAAGTTTTCTCGCGTTCTTTGTCTTGCATTGGATTTGCATCAGCATTACATATAGTTATATA  
ACCCAACCTAAGCCGGAGGTTAAAAAGGTAGTCTCTCAGACCTATGATTTTGATAAATCACTATTGACT  
CTTCTCAGCGTCTTAATCTAAGCTATCGCTATGTTTTCAAGGATTCTAAGGGAAAATTAATTAATAGCGAC  
GATTTACAGAAGCAAGGTTATTCACTCACATATATTGATTTATGTACTGTTTCCATTAAAAAAGGTAATTC  
AAATGAAATTGTTAAATGTAATTAATTTTGTCTTCTGATGTTTGTTCATCATCTTCTTTTGTCTCAGGTAA  
TTGAAATGAATAATTCGCCTCTGCGGATTTTGTAACTGGTATTCAAAGCAATCAGGCGAATCCGTTAT  
TGTTTCTCCCGATGTAAAAGGTAATGTTACTGTATATTCACTGACGTTAAACCTGAAAATCTACGCAATT  
TCTTTATTTCTGTTTTACGTGCAAATAATTTTGTATATGGTAGGTTCTAACCTTCCATTATTCAGAAGTATA  
ATCCAAACAATCAGGATTATATTGATGAATTGCCATCATCTGATAATCAGGAATATGATGATAATCCGC  
TCCTTCTGGTGGTTTTCTTTGTCCGCAAATGATAATGTTACTCAAACCTTTTAAATTAATAACGTTCCGGG  
CAAAGGATTTAATACGAGTTGTGCAATTGTTTGTAAAGTCTAATACTTCTAAATCCTCAAATGTATTATCT  
ATTGACGGCTCTAATCTATTAGTTGTTAGTGCTCCTAAAGATATTTTAGATAACCTTCTCAATTCCTTTCA

ACTGTTGATTTGCCAACTGACCAGATATTGATTGAGGGTTTGATATTTGAGGTTTCAGCAAGGTGATGCTT  
TAGATTTTTCATTTGCTGCTGGCTCTCAGCGTGGCACTGTTGCAGGCGGTGTTAATACTGACCGCCTCAC  
CTCTGTTTTATCTTCTGCTGGTGGTTCGTTTCGGTATTTTTAATGGCGATGTTTTAGGGCTATCAGTTCGCG  
CATTAAAGACTAATAGCCATTCAAAAATATTGTCTGTGCCACGTATTCTTACGTTTTAGGTCAGAAGGG  
TTCTATCTCTGTTGGCCAGAATGTCCCTTTTATTACTGGTCTGTGACTGGTGAATCTGCCAATGTAAATA  
ATCCATTTGAGACGATTGAGCGTCAAATGTAGGTATTTCCATGAGCGTTTTTCTGTTGCAATGGCTGG  
CGGTAATATTGTTCTGGATATTACCAGCAAGGCCGATAGTTTGAGTTCCTTACTCAGGCAAGTGATGTT  
ATTACTAATCAAAGAAGTATTGCTACAACGGTTAATTTGCGTGATGGACAGACTTTTTACTCGGTGGCC  
TCACTGATTATAAAAACACTTCTCAGGATTCTGGCGTACCGTTCCTGTCTAAAATCCCTTTAATCGGCCTC  
CTGTTTAGCTCCCGCTCTGATTCTAACGAGGAAAGCACGTTATACGTGCTCGTCAAAGCAACCATAGTAC  
GCGCCCTGTAGCGGCGCATTAAAGCGCGGCGGGTGTGGTGGTTACGCGCAGCGTGACCGCTACACTTGC  
CAGCGCCCTAGCGCCCGCTCCTTTCGCTTCTCCCTTCTTCTCGCCACGTTCCGCCGGCTTTCCCGTCA  
AGCTCTAAATCGGGGGCTCCCTTAGGGTTCGGATTTAGTGCTTACGGCACCTCGACCCCAAAAACCTT  
GATTTGGGTGATGGTTCACGTAGTGGGCCATCGCCCTGATAGACGGTTTTTCGCCCTTGACGTTGGAGT  
CCACGTTCTTTAATAGTGGACTCTTGTTCCAAACCTGGAACAACACTCAACCCTATCTCGGGCTATTCTTTT  
GATTTATAAGGGATTTTGCCGATTTTCGGAACCACCATCAAACAGGATTTTCGCCTGCTGGGGCAAACCA  
GCGTGGACCGCTTGCTGCAACTCTCTCAGGGCCAGGCGGTGAAGGGCAATCAGCTGTTGCCCGTCTCAC  
TGGTGAAGAAAGAAAACCACCCTGGCGCCAATACGCAAACCGCCTCTCCCGCGCGTTGGCCGATTGAT  
TAATGCAGCTGGCAGCAGAGGTTTCCCGACTGGAAAGCGGGCAGTGAGCGCAACGCAATTAATGTGAG  
TTAGCTCACTCATTAGGCACCCAGGCTTACACTTTATGCTTCCGGCTCGTATGTTGTGTGGAATTGTGA  
GCGGATAACAATTTACACAGGAAACAGCTATGACCATGATTACGAATTCGAGCTCGGTACCCGGGGAT  
CCATTCTCCTGTGACTCGGAAGTGCAATTTATCATCTCCATAAAAACAAAACCCGCCGTAGCGAGTTCAGAT  
AAAATAAATCCCGCGAGTGCGAGGATTGTTATGTAATATTGGGTTAATCATCTATATGTTTTGTACAG  
AGAGGGCAAGTATCGTTTCCACCGTACTCGTGATAATAATTTGCACGGTATCAGTCAATTTCTCGCACATT  
GCAGAAATGGGGATTTGTCTTATTAGACTTATAAACCTTCATGGAATATTTGTATGCCGACTCTATATCTA  
TACCTTCATCTACATAAACACCTTCGTGATGTCTGCATGGAGACAAGACACCGGATCTGCACAACATTGA  
TAACGCCCAATCTTTTTGCTCAGACTCTAACTCATTGATACTCATTTATAAACTCCTTGCAATGTATGTCGT  
TTCAGCTAAACGGTATCAGCAATGTTTATGTAAAGAAACAGTAAGATAATACTCAACCCGATGTTTGAGT  
ACGGTCATCATCTGACACTACAGACTCTGGCATCGCTGTGAAGACGACGCGAAATTCAGCATTTTCACAA  
GCGTTATCTTTTACAAAACCGATCTCACTCTCCTTTGATGCGAATGCCAGCGTCAGACATCATATGCAGAT  
ACTCACCTGCATCCTGAACCCATTGACCTCCAACCCCGTAATAGCGATGCGTAATGATGTCGATAGTTAC  
TAACGGGTCTTGTTGATTAATGCGCGAGAACTCTTCCAGGTCACCAGTGCAGTGCTTGATAACAGGA  
GTCTTCCCAGGATGGCGAACAACAAGAACTGGTTTCCGTCTTACGGACTTCGTTGCTTTCCAGTTTAG  
CAATACGCTTACTCCCATCCGAGATAACACCTTCGTAATACTCACGCTGCTCGTTGAGTTTTGATTTTGT  
GTTTCAAGCTCAACACGCGAGTTTCCCTACTGTTAGCGCAATATCCTCGTTCTCCTGGTCCGCGGCTTTGAT  
GTATTGCTGGTTTTCTTCCCGTTCATCCAGCAGTTCAGCACAAATCGATGGTGTACCAATTCATGGAAAA  
GGTCTGCGTCAAATCCCGAGTCGTCATGCATTGCCTGC
